## 23 **ABSTRACT**

24 Viral structural proteins can have multiple activities. Antivirals that target structural  
25 proteins have potential to exhibit multiple antiviral mechanisms. Hepatitis B Virus (HBV) core  
26 protein (Cp) is involved in most stages of the viral lifecycle: it assembles into capsids, packages  
27 viral RNA, is a metabolic compartment for reverse transcription, interacts with nuclear  
28 trafficking machinery, and disassembles to release the viral genome into the nucleus. During  
29 nuclear localization, HBV capsids bind to host importins (e.g. Imp $\beta$ ) via Cp's C-terminal domain  
30 (CTD); the CTD is localized to the interior of the capsid and is transiently exposed on the  
31 exterior. We used HAP12 as a representative Cp Allosteric Modulators (CpAMs), a class of  
32 antivirals that inappropriately stimulates and misdirects HBV assembly and deforms capsids.  
33 CpAM impact on other aspects of the HBV lifecycle is poorly understood. We investigated how  
34 HAP12 influenced the interactions between empty or RNA-filled capsids with Imp $\beta$  and trypsin  
35 *in vitro*. We showed that HAP12 can modulate CTD accessibility and capsid stability, depending  
36 on the saturation of HAP12-binding sites. We demonstrated that Imp $\beta$  synergistically  
37 contributes to capsid disruption at high levels of HAP12 saturation, using electron microscopy  
38 to visualize disruption and rearrangement of Cp dimers into aberrant complexes. However,  
39 RNA-filled capsids resisted the destabilizing effects of HAP12 and Imp $\beta$ . In summary, we show  
40 host protein-induced catalysis of capsid disruption, an unexpected additional mechanism of  
41 action for CpAMs. Potentially, untimely capsid disassembly can hamper the HBV lifecycle and  
42 also cause the virus to become vulnerable to host innate immune responses.

43

## 44 **IMPORTANCE**

45 The HBV core, an icosahedral complex of 120 copies of the homodimeric core (capsid) protein  
46 with or without packaged nucleic acid, is transported to the host nucleus by its interaction with  
47 host importin proteins. Importin-core interaction requires the core protein C-terminal domain,  
48 which is inside the capsid, to “flip” to the capsid exterior. Core-protein directed drugs that  
49 affect capsid assembly and stability have been developed recently. We show that these  
50 molecules can, synergistically with importins, disrupt capsids. This mechanism of action,  
51 synergism with host protein, has potential to disrupt the virus lifecycle and activate the innate  
52 immune system.

53

## 54 **INTRODUCTION**

55 Chronic Hepatitis B Virus (HBV) infection is endemic and, though not a regular discussion  
56 in the daily news, a global health crisis (1). Chronic HBV afflicts approximately 300 million  
57 people and can lead to cirrhosis, hepatocellular carcinoma, and liver failure; it contributes to  
58 about 880,000 deaths annually (2). Although there is an effective vaccine available, it does not  
59 help those who are chronically infected. Current therapeutics (mainly directed against the viral  
60 DNA polymerase) are rarely curative, so there is a great need to develop new and better  
61 antivirals.

62 An attractive drug target for new HBV therapeutics is the core protein (Cp) (3). The Cp  
63 plays roles in most stages of the viral lifecycle: assembling on and encapsidating viral RNA and  
64 polymerase, acting as a metabolic compartment for reverse transcription to DNA, and  
65 regulating capsid transport to the nucleus to maintain infection or to the ER to be secreted (4-  
66 6). Most capsids are composed of 120 homodimers arranged with T=4 icosahedral symmetry. A

67 small fraction of capsids have 90 dimers with T=3 symmetry. Dimers associate through weak  
68 hydrophobic contacts at the inter-dimer interfaces (7). Cp has an assembly domain (residues 1-  
69 149) and a nucleic acid-binding C-terminal domain (CTD, residues 150-183). During viral  
70 replication, approximately 90% of capsids are without a viral genome (8). In T=4 capsids, Cp is  
71 found as quasi-equivalent A, B, C, and D monomers, which form AB and CD dimers. The  
72 interface between two dimers forms a small hydrophobic pocket, which can be probed with  
73 small molecules (4, 9).

74 Core protein allosteric modulators (CpAMs) are small molecules that can probe HBV  
75 capsids by binding to interdimer contacts (10). Heteroaryldihydropyrimidines (HAPs) are a class  
76 of CpAMs that have been extensively studied for their ability to accelerate and misdirect capsid  
77 assembly (11-13). When bound at Cp-Cp contact sites, in the HAP pocket, HAPs increase the  
78 association energies of dimer-dimer contacts. Cp assembled in the presence of HAPs can  
79 produce aberrant structures with varying morphology, depending on the CpAM chemotype (13-  
80 15). HAPs can also cause capsid deformation by disturbing the capsid's icosahedral geometry.  
81 When incubated with the molecule HAP-TAMRA, capsid quasi-sixfold vertices became  
82 flattened, a defect that can propagate to yield highly irregular particles (15). Thus, not only do  
83 these antivirals impair capsid assembly, but they can also target morphologically "normal"  
84 capsids, even "melting" virions to prevent infection (16, 17). Although we understand how  
85 HAPs influence the capsid's structure, it is still poorly understood how HAP-induced  
86 deformation impacts HBV biology in an infected cell.

87 Much of HBV Cp biology is a function of the CTDs. The CTDs are intrinsically disordered  
88 and positively charged (16 arginines out of 34 residues). In the context of an icosahedral capsid,  
89 CTDs are clustered around quasi-sixfold and five-fold vertices (18). CTDs play important roles in  
90 RNA packaging and regulating reverse transcription (19-21). Though they are ostensibly on the  
91 inside of the capsid, they can transiently flip out to the capsid exterior to expose nuclear  
92 localization signals (22-26). The organization and mobility of CTDs are influenced by  
93 phosphorylation and nucleic acid content (27-30). In the nucleic acid-filled particles, CTDs will  
94 electrostatically interact with the negatively charged nucleic acid and stay primarily internalized  
95 (18). During infection, capsids, containing relaxed circular DNA (rcDNA), can localize to the  
96 nucleus via interaction with host importins  $\alpha$  (Imp $\alpha$ ) and  $\beta$  (Imp $\beta$ ) (31). Once the capsid is  
97 imported into the nuclear pore complex, the capsid protein will interact with nucleoporin 153,  
98 disassemble, and release its genome (32, 33). Previously, it was shown that both Imp $\alpha$  and  
99 Imp $\beta$  were required for nuclear trafficking (33-35). However, Imp $\beta$  can directly bind to the  
100 empty capsids or dimers without the presence of Imp $\alpha$  and can be internalized (26).

101 Here, we examine how CpAMs affect CTD mobility. How these antivirals impact other  
102 aspects of the lifecycle is still unclear. For these studies we use the CpAM HAP12, which has  
103 strong Cp-binding activity in vitro and efficacy in vivo (13). HAP12 is structurally very similar to  
104 GLS4 (12). In this study, we investigated how HAP12-binding affects the CTD's ability to interact  
105 with Imp $\beta$ . We found that the CTD's mobility increased with high HAP12 stoichiometry, causing  
106 more CTD-Imp $\beta$ -binding. Surprisingly, excess HAPs led to capsid disruption in empty particles.  
107 However, despite excess HAPs, capsids with internal RNA did not experience greater Imp $\beta$ -  
108 binding and were able to maintain their structural integrity. In this work, we showed how two  
109 exogenous molecules work synergistically to destabilize HBV capsids. Our study also

110 investigated how a second antiviral mechanism of action, capsid dissociation, is modulated by  
111 CpAMs and host proteins.

112

113

## 114 RESULTS

115

### 116 Capsid proteolysis and Imp $\beta$ binding experimental schematic.

117 HAPs, like many CpAMs, cause capsid deformation and even disruption on a global level  
118 (14, 15). Because Cp dimers appear to be relatively rigid and CpAMs bind at the interface  
119 between dimers, deformation is likely to be manifested in the dimer-dimer geometry and at  
120 vertices. CTDs are clustered around fivefold and quasi-sixfolds vertices, therefore, we  
121 anticipated that HAPs would change the external exposure of CTDs.

122 To test our prediction that CpAMs modulate CTD exposure, we determined the effect of  
123 the CpAM HAP12 on CTD susceptibility to proteolysis and CTD ability to bind Imp $\beta$  (Figure 1A  
124 and 1B). Imp $\beta$  binds a basic peptide of ca. 40 amino acids (36), much longer than a typical  
125 nuclear localization sequence (NLS); therefore, Imp $\beta$  is a sensitive tool for probing CTD  
126 exposure. The impact of CpAMs on CTD exposure has not previously been tested. Complicating  
127 this test, the effect of a HAP on assembly is highly dose dependent. At low ratios of HAP to Cp,  
128 morphologically normal capsids form while when HAP is super-stoichiometric – that is, there is  
129 more than one active HAP per subunit – abnormal polymers assemble (13, 14). For this reason,  
130 we wanted to examine how different ratios of CpAM modulated CTD exposure.

131

### 132 High concentrations of the CpAM HAP12 change the CTD proteolysis pattern.

133 Low HAP12:dimer ratios stabilize empty capsids and were predicted to decrease CTD  
134 proteolysis. Conversely, super-saturating ratios of HAP12, which cause capsid deformation even  
135 with intact capsids, were predicted to make empty capsids more vulnerable to proteolysis. To  
136 test this, empty capsids were treated with HAP12, proteolyzed with trypsin, and the digested  
137 products were analyzed by SDS-PAGE and LC-MS. For these experiments, 7  $\mu$ M Cp183 dimer  
138 were used. The HAP12 ratio was calculated by accounting for HAP12's racemic mixture, half of  
139 which is inactive, and that each dimer forms two HAP binding sites. Therefore, we used 14  $\mu$ M  
140 HAP12 as a sub-saturating concentration, 28  $\mu$ M as saturating, and 56  $\mu$ M as super-saturating.  
141 These concentrations are well above the dissociation constant of HAP12 for capsid, so it is  
142 assumed all active HAP12 is bound (13). These concentrations corresponded to 1 active HAP12  
143 molecules per dimer, 2 active HAP12 molecules per dimer, and 4 active HAP12 molecules per  
144 dimer, respectively.

145 Because different HAP12 regimens have different effects on capsid stability, we  
146 examined how they affected the kinetics of CTD exposure. The trypsin concentration for these  
147 experiments was chosen to avoid the much slower cleavage of the assembly domain (37). The  
148 loss of the parent Cp183 was expected to yield first order kinetics. Cp183 and cleavage products  
149 were visualized by SDS-PAGE and normalized to the total optical density of a given lane. For all  
150 nontreated and HAP12-treated data sets, a single exponential fit showed systematic differences  
151 in the rates of proteolysis. Data were well fit by two first order decays:

152

$$153 \text{ (i) } [\text{Cp183}] = B_1 e^{(-x*(1/k1))} + B_2 e^{(-x*(1/k2))} + (1 - B_1 - B_2)$$

154

155 Coefficients  $B_1$  and  $B_2$  are the fraction of Cp183 in each of two populations of CTDs (Table 1)  
156 with  $k_1$  and  $k_2$  as the respective rate constants. A population of uncleaved CTD is explicit in the  
157 final term of this equation. From HAP12-free to saturating HAP12, the fast-cleaving CTDs of  
158 empty capsids accounted for  $33\% \pm 5\%$  of the Cp183 with a half-life of  $0.4 \pm 0.03$  min. For the  
159 slow-cleaving population, the proteolysis accounted for  $51\% \pm 8\%$  with a half-life of  $7 \pm 2$  min.  
160 At super-stoichiometric HAP12, 74% of CTDs were rapidly cleaved with a half-life of 0.47 min;  
161 the remaining 25% had a half-life of 2.40 min.

162 The cleavage kinetics for drug-free to saturated HAP12 datasets were very similar. It is  
163 not until there was super-saturating HAP12 that we observed significant changes. Our data  
164 showed that HAP12 does not change CTD exposure in empty capsids until HAP12 reaches  
165 super-stoichiometric concentrations where it can induce capsid deformation that would expose  
166 more CTDs. Another issue to consider is whether the T=4 symmetry would modulate cleavage  
167 kinetics, i.e. would rates correspond to the A, B, C, and D subunits. The 33% average coefficient  
168 for the fast cleavage rate is far enough from the value of 25% predicted by quasi-equivalence,  
169 that quasi-equivalence seems an unlikely explanation. We suggest that cleavage rates may be  
170 affected by progressive charge changes within the capsid during proteolysis as well as capsid  
171 heterogeneity along with quasi-equivalence.

172 The pattern of CTD cleavage is also affected by capsid content. For HAP12-free empty  
173 capsids, proteolysis with trypsin yielded three doublets of cleaved Cp183 and a faint seventh  
174 band by SDS-PAGE (Figure 2A). For empty capsids treated with super-saturating HAP12, all Cp  
175 was proteolyzed to the lowest molecular weight band (Figure 2A). Reaction mixtures were  
176 further analyzed by LC-MS to identify SDS-PAGE bands. The highest molecular weight band  
177 corresponded to Cp183, and the lowest molecular weight band to the N-terminal 150 residues  
178 of Cp (Figure 2A). Other LC-MS data indicated cleavage after residue 175, 157, 152, and 151  
179 (Figure 2A). These are consistent with previous CTD proteolysis studies (28).

180 We anticipated that pgRNA-filled capsids would be more resistant to proteolysis than  
181 empty capsids since electrostatic interactions between the RNA and CTDs would keep these  
182 flexible peptides inside (18). We also predicted that pgRNA capsids would become more  
183 susceptible to proteolysis after HAP12 treatment, based on our proteolysis results with empty  
184 capsids (Figure 2A). For these experiments, purified Cp183 dimers were assembled with *in vitro*  
185 transcribed pgRNA to produce RNA-filled capsids. In the absence of HAP12, pgRNA-filled capsids  
186 were slightly slower to show signs of proteolysis. However, the pgRNA-filled capsids yielded a  
187 cleavage pattern distinctly different from those of empty capsids (Figure 2A). An important  
188 difference was that pgRNA-filled capsids had a prominent band for cleavage to residue 150,  
189 almost absent in empty capsids, suggesting that for at least a subset of subunits the CTDs were  
190 more easily digested to the junction with the assembly domain. The pgRNA capsids also had a  
191 different relative distribution of the cleavage doublets. In the presence of super-saturating  
192 HAP12, pgRNA-filled capsids were more resistant to proteolysis than empty capsids, retaining  
193 small amounts of partially cleaved Cp183 after one hour, but more sensitive to proteolysis than  
194 pgRNA-filled capsids without HAP (Figure 2A).

195 As an alternative to *in vitro* assembled pgRNA-filled capsids, we also tested E. coli RNA-  
196 filled capsids. When expressed in E. coli, Cp183 dimers assemble around non-specific E. coli  
197 RNA (20, 38, 39). For E. coli RNA-filled capsids in the absence of HAP12, the most prominent

198 band after trypsin treatment remained intact Cp183, showing that these capsids were more  
199 resistant to proteolysis than empty and pgRNA-filled capsids (Figure 2A). Digestion of *E. coli*  
200 RNA-filled capsids with super-saturating HAP12 produced almost equal distributions of each  
201 proteolysis product. The *E. coli* RNA capsids were much more resistant to trypsin than pgRNA-  
202 filled capsids. *E. coli* RNA-filled capsids had a larger population of uncleaved CTDs at one hour  
203 (64% and 27%, respectively) compared to those of pgRNA-filled capsids (24% and 4%,  
204 respectively) (Table 1). However, with no HAP12 or excess HAP12, both RNA capsids had a  
205 similar fast-cleaving population of  $22\% \pm 2\%$ , which is close to the 25% predicted for quasi-  
206 equivalence. The data suggests that a quasi-equivalent class of monomers are less protected by  
207 the internal RNA and more accessible for proteolysis.

208 The difference in cleavage pattern and extent suggested fundamental mechanistic  
209 differences in CTD exposure. To compare the differences, we measured the rates of loss of  
210 Cp183 for empty, pgRNA, and *E. coli* RNA capsids, with and without super-saturating  
211 concentrations of HAP12. On a relative scale, depending on the presence of HAP12, empty  
212 capsids exhibited the fastest hydrolysis, pgRNA-filled capsids showed an intermediate rate, and  
213 *E. coli* RNA-filled capsids had the slowest hydrolysis (Figure 2B, 2C, & 2D). In the absence of  
214 HAP12, digestion appeared to stall for all three capsid types tested. In the presence of super-  
215 saturating concentrations of HAP12, empty and pgRNA capsids lost 100% of the initial Cp183  
216 (Figure 2D and Table 1). For *E. coli* RNA-filled capsids, CTDs were hydrolyzed slightly faster than  
217 in the absence of HAP12 but was still the slowest of the HAP-bound capsids; also, it was not  
218 clear whether digestion would proceed to completion with longer incubation. For both  
219 untreated and treated conditions, our data demonstrated that the RNA content of a capsid can  
220 modulate the kinetics of CTD exposure. However, the RNA-CTD interaction does not completely  
221 trap CTDs within the capsid and prevent exposure.

222

### 223 **HAP12-treatment causes capsid deformation.**

224 Our proteolysis data indicated that HAP12 caused local structural changes that  
225 increased CTD exposure. To determine how these observations correlate with global changes in  
226 capsid morphology, we treated empty capsids with saturating HAP12 and examined them by  
227 negative stain transmission electron microscopy (TEM). Previous work with HAP-TAMRA and  
228 Cp149 capsids showed that HAPs caused deformation of normal capsids (15); similar behavior  
229 was seen with a dibenzothiazepine CpAM (40). We anticipated that HAP12-treatment of empty  
230 Cp183 capsids would also lead to capsid deformation. Capsid samples were stained with  
231 ammonium molybdate and trehalose, where trehalose was used to maintain the 3D structure  
232 of capsids by minimizing the sample flattening that occurs when drying grids. In representative  
233 micrographs, HAP-treated capsids show a relatively small number of divergences from control  
234 particles (Figure 3A and 3B). 2D class averages tell a more detailed story. Class averages of  
235 untreated capsids showed nearly circular particle projections (Figure 3C); this morphology is  
236 also seen in cryo-EM (15). Class averages of HAP12-treated capsids displayed distinctly  
237 deformed structures; capsids were faceted, elongated, and broken (Figure 3D). Faceted and  
238 elongated capsids were the most common. The first ten classes accounted for 86% of the  
239 images. It was not clear how their global structural changes affected local regions of the capsid  
240 and led to greater CTD mobility. The broken capsid classes, which only accounted for 4% of the  
241 images, showed unambiguously how internal CTDs could be probed by proteolysis. It is possible

242 that local changes could lead to greater CTD exposure or that HAP12 promoted  
243 transient ruptures. In addition, we noted that the asymmetry of these classes could explain why  
244 the populations from our proteolysis curve-fitting (Table 1) was not consistent with quasi-  
245 equivalence.

246

247 **HAP12 with Imp $\beta$  led to disruption of empty capsids, but E. coli RNA-filled capsids appeared**  
248 **unperturbed.**

249 The proteolysis data indicated that high HAP12 concentrations led to more CTD  
250 exposure in terms of the fraction of CTDs exposed, the length of the exposed peptide, and the  
251 rate of exposure. TEM data confirmed that HAP12 treatment causes capsid deformation, which  
252 correlates with greater CTD accessibility. This led us to question whether HAP12-treatment  
253 increased capsid binding to a biologically relevant ligand, the nuclear transport protein Imp $\beta$ ,  
254 and whether the stress of two different capsid ligands, HAP12 and Imp $\beta$ , changed capsid  
255 integrity. Initially, we tested and confirmed Imp $\beta$  binding to empty capsids under HAP12-free  
256 and HAP12-treated conditions (Supp. Figure 1A-C). To observe capsid morphology, untreated  
257 and HAP12-treated empty and E. coli RNA-filled capsids were mixed with Imp $\beta$ , dialyzed into  
258 low salt, and observed via negative stain TEM. Control micrographs show that untreated  
259 capsids, empty and E. coli RNA-filled, appeared spherical and intact (Figure 4). Addition of Imp $\beta$   
260 had little effect on capsid morphology. We observed similar capsid morphology when sub-  
261 saturating HAP12 and Imp $\beta$  were added to empty and E. coli RNA-filled capsids. However, we  
262 note that, at sub-saturating HAP12, the capsid border appeared uneven and thicker than those  
263 of non-drugged capsids. The thicker capsid shells may be due to bound Imp $\beta$ . The observation  
264 of thicker capsid walls made us curious if sub-saturating HAP12 stabilized empty capsids,  
265 reduced internalization of Imp $\beta$ , and led to more externally bound Imp $\beta$ . To test this, 2D class  
266 averages were generated to determine the morphology of these capsids.

267 For empty capsids with Imp $\beta$ , based on class averages, 48% of particles showed visible,  
268 externally bound Imp $\beta$ , while 32% of particles showed no Imp $\beta$  (Supp. Figure 2A). One class,  
269 accounting for 13% of particles, had density within the bounds of the capsid walls, suggesting  
270 internalized Imp $\beta$  as observed in earlier studies (26). It is possible that in classes without  
271 evident Imp $\beta$ , the importin adopted varying conformations so that the signal was blurred into  
272 background during averaging. With Imp $\beta$  and sub-saturating HAP12, 90% of empty capsids  
273 showed unambiguous, externally bound Imp $\beta$  (insets in Figure 4 and Supp. Figure 2B). This  
274 observation suggests that these Imp $\beta$  adopted similar localizations. The Imp $\beta$  density (“U” or  
275 “J” shaped) and arrangement were clear enough to allow us to determine which symmetry axis  
276 we were looking at, based on the number of external Imp $\beta$  in each class. Ten external Imp $\beta$   
277 separated at the same intervals on the particle surface suggested that we were looking down a  
278 five-fold axis (Supp. Figure 2B). Eight external Imp $\beta$  suggested that we were peering down a  
279 twofold axis. Two classes, accounting for 7% and 2% of classified particles, had strong internal  
280 density and two (17% and 10%) had internal “U” shaped features that were suggestive of  
281 internalized Imp $\beta$  but could also be CTDs (some of these observations are addressed in the  
282 CDMS analysis below).

283 E. coli RNA-filled capsids appeared unperturbed and maintained normal capsid  
284 morphology even with excess HAP12 (Figure 4). 2D class averages of these samples confirmed  
285 that E. coli RNA capsids were able to maintain capsid geometry despite the presence of Imp $\beta$

286 and super-stoichiometric CpAM (Supp. Figure 3B). It appears that the interaction between  
287 internal RNA and CTDs reduces all or most subunit modulation caused by HAP12-binding.  
288 However, we note that our proteolysis data still indicated super-saturating HAP12 changed CTD  
289 exposure (Figure 2 and Table 1).

290 When saturating or super-saturating HAP12 and Imp $\beta$  are added, empty capsids became  
291 a heterogenous population of spherical capsids, deformed but intact capsids, ruptured capsids,  
292 and large Cp oligomers. To avoid the artifacts of negative stain TEM, we performed cryo-  
293 electron tomography to characterize the diverse population of deformed and disrupted  
294 particles. The tomograms showed new 3D structural features (Figure 5). Consistent with  
295 negative stain TEM, we observed a range of Cp oligomers. The largest oligomers had clear  
296 regions of hexagonal patterning. Not seen in negative stain images, we also observed areas of  
297 flat Cp sheets. Some sheets were relatively small and suggested a capsid that had unraveled in  
298 favor of planar geometry, leaving numerous gaps. Other oligomers were much larger than  
299 capsids, indicating that subunits, or oligomers of subunits, had been released and subsequently  
300 re-associated. The tomograms show how small molecules that impair Cp assembly also disrupt  
301 capsids and rearrange subunit geometry.

302

### 303 **CDMS of empty capsids $\pm$ Imp $\beta$ $\pm$ HAP12 showed shifts in mass and charge.**

304 The combination of HAP12 and Imp $\beta$  led to structural and physical-chemical changes to  
305 empty capsids. This suggested that HAP12-induced capsid deformation could influence the  
306 number of Imp $\beta$  binding to capsids. We predicted that saturating HAP12 treatment would allow  
307 more Imp $\beta$  to bind to capsids compared to apo capsids and that greater Imp $\beta$  binding would  
308 correlate with more capsid disruption. To measure the number of bound Imp $\beta$ , capsid  
309 complexes were analyzed by charge detection mass spectrometry (CDMS). CDMS measures the  
310 mass-to-charge ratio ( $m/z$ ) and charge ( $z$ ) of each ion; these values are multiplied to give the  
311 mass of each ion, making it particularly powerful when the sample is heterogenous. The surface  
312 area of a particle dictates the number of charges on the ion; an approximation of the charge on  
313 a spherical water droplet, the Rayleigh limit, is a predictor for the number of charges on a  
314 spherical particles (41), while highly charged ions located above the limit are likely to have  
315 more extended or textured surfaces (42).

316 Empty capsids exhibited a narrow peak at 5.3 MDa, which is consistent with the mass  
317 expected for a T=4 capsid (5.05 MDa) plus about 1% for counterions, salts, and water that  
318 remained closely associated the particle (Figure 6A1). In the charge versus mass plot, where  
319 each point represents an individual ion, we see that empty capsids were closely distributed  
320 along the Rayleigh limit (Figure 6B1). The 3D heatmap gives a clearer and more quantitative  
321 view of the distribution of ions in terms of mass and charge (Figure 6C1).

322 When Imp $\beta$  is added to empty capsids, the mass peak shifts to 9.0 MDa, indicating a  
323 modal average of about 38 Imp $\beta$  molecules (97 kDa each) binding to each capsid (Figure 6A2).  
324 The charge versus mass plot shows two main populations of ions: a distribution near the  
325 Rayleigh limit and a vertical plume extending away from the limit (Figure 6B2). The charge plot  
326 suggests that this sample contained both compact spherical particles and extended or more  
327 textured particles. As the corresponding TEM data showed no broken capsids or other  
328 extended structures, we suggest that the highly charged distribution was attributed to Imp $\beta$ -  
329 decorated capsids, which would be highly textured and could accept more charge. The 3D



330 heatmap revealed that most of the ions were spherical (Figure 6C2). When sub-saturating  
331 HAP12 and Imp $\beta$  are added, a similar mass was detected at 8.95 MDa, also corresponding to 38  
332 Imp $\beta$  per capsid (Figure 6A3). However, unlike the sample without HAP12, the 3D heatmap  
333 indicated that sub-saturating HAP12 led to more ions in the plume than in the cluster (Figure  
334 6C3). This observation and the previous 2D class averages indicated to us that adding sub-  
335 stoichiometric HAP12 to empty capsids led to more externally bound Imp $\beta$ . As a working  
336 hypothesis, in the absence of HAP12 and when a CTD binds Imp $\beta$ , the capsid may internalize  
337 the host protein to relieve some of the mechanical strain on the capsid. However, with sub-  
338 saturating HAP12, CpAMs can strengthen Cp-Cp contacts and consequently suppress transient  
339 ruptures so that bound Imp $\beta$  remains outside.

340 Super-saturating HAP12 and Imp $\beta$  led to a shift in mass to 11.2 MDa, corresponding to  
341 approximately 64 Imp $\beta$  per capsid (Figure 6A4). We also observed presence of many small and  
342 large ions, suggesting that some capsids had fragmented and some Cp183 dimers had coalesced  
343 into larger complexes (Figure 4 and Figure 6A4). This is consistent with tomographic data  
344 showing loosely connected sheets of protein and free subunits rearranging to create new  
345 structures (Figure 5). Of note, we observed a small broad peak at 22.92 MDa, which may be a  
346 dimer of two capsids; examination of the other mass spectra showed the same double capsid  
347 peak. Most of the ions attributed to capsids with Imp $\beta$  and super-saturating HAP12 were near  
348 the Rayleigh limit, suggesting that most had a “spherical” morphology (Figure 6B4 and 6C4).  
349 The corresponding TEM images showed many “normal-sized” particles and a heterogeneous  
350 population of large oligomers (Figure 4). We also note that addition of saturating HAP12  
351 produced similar mass and charge results as seen in the super-saturating HAP12 samples (Supp.  
352 Figure 4A5, 4B5, and 4C5).

353 While empty capsids showed evidence of CTD exposure and capsid deformation, at  
354 super-saturating HAP12, CDMS of *E. coli* RNA-filled capsids exhibited no mass shifts (Figure  
355 6A5). Independent of all HAP12 concentrations, the peak attributed to *E. coli* RNA-filled capsids  
356 ranged from ~6.5-6.9 MDa, indicating little to no Imp $\beta$  binding (Figure 6A5 and Supp. Figure  
357 4A1-C4). This ~1.4 MDa mass difference compared to empty capsid is attributable to about  
358 4,200 nucleotides of RNA. Most of the ions were near the Rayleigh limit, suggesting intact  
359 round capsids (Figure 6B5 and Supp. Figure 4B1-B4).

360

## 361 DISCUSSION

362 Our study shows that exogenous molecules can work synergistically to disrupt HBV  
363 capsids. HAP12 globally disrupts capsid geometry and also modulates the accessibility of CTDs.  
364 CTD mobility and capsid stability are differentially modulated, depending on saturation of HAP  
365 sites. At low HAP12 saturation, CTD exposure remained unchanged compared to unmodified  
366 capsid, but capsids appeared to be more stable. At saturating or excess HAP12, CTD accessibility  
367 to protease increases, and capsids become disrupted with addition of Imp $\beta$ 's. Additionally,  
368 encapsidated RNA modulated CTD exposure and increased capsid stability. *E. coli* RNA-filled  
369 capsids did not experience significant HAP-induced changes to their capsid geometry, as was  
370 observed with empty capsids. The RNA content of these capsids appeared to protect them  
371 against disruption. Though we were unable to test the sensitivity of a mature dsDNA-filled  
372 capsid to CpAMs and Imp $\beta$ , the predicted and observed fragility of these particles (43, 44), led  
373 us to predict that they will be about as sensitive to disruption as empty particles.

374 This work shows that Cp-Cp interactions and consequently capsid stability can be  
375 exploited by small molecules. Like other CpAMs, HAPs exert seemingly paradoxical effects when  
376 bound to HBV capsids (16, 17). These small molecules increase the association energy of  
377 interdimer contacts (13, 15). However, by locally distorting the interdimer interface, HAPs can  
378 disturb global icosahedral geometry (15-17, 40, 45, 46). As more HAPs bind, a global cascading  
379 effect on capsid structure leads to deformation and eventually disruption (14-17, 40). HAP12  
380 concentration also differentially affects CTD and capsid dynamics. In a T=4 capsid, there are A,  
381 B, C, and D pockets, each capped by a neighboring subunit. HAPs preferentially bind B and C  
382 sites; A and D sites are sterically hindered (see Figure 3a in reference (40)). In sub-saturating  
383 conditions, when HAP fills B and C sites, capsids are stabilized (13). We observe that when there  
384 is enough HAP to fill all four classes of site, capsids are destabilized because HAPs disrupt  
385 icosahedral geometry (14, 40). We showed that untreated or sub-saturating HAP12 conditions  
386 did not increase CTD sensitivity to protease activity in empty capsids. CTD accessibility only  
387 increases when HAPs reach a concentration threshold of saturating or higher. Therefore, Cp-Cp  
388 interactions experience a local stabilizing effect and global destabilizing effects from HAPs,  
389 depending on concentration, and CTD mobility is not directly affected by CpAMs.

390 The stabilizing and destabilizing effects of CpAMs can be exacerbated by Imp $\beta$ . At sub-  
391 saturating HAP12, empty capsids do not show deformation but exhibit more externally bound  
392 Imp $\beta$  than seen with undrugged empty capsids. This assertion is based on CDMS data showing  
393 that the +HAP12 +Imp $\beta$  empty particles have a larger population of ions with charge in excess  
394 of the Rayleigh limit than the -HAP12 particles, suggesting that the +HAP12 particles have more  
395 textured surfaces (Figure 6C2 and 6C3). This observation is consistent with a sub-saturating  
396 HAP12, bound at a subset of pockets, that strengthens dimer-dimer interactions to prevent  
397 capsids from transiently breaking and internalizing bound Imp $\beta$ 's (26). In addition, externally  
398 bound importins may further stabilize the capsids by neutralizing some of the positive charges  
399 at CTD clusters around the quasi-six-fold vertices (18). When we add saturating or super-  
400 saturating HAP12 along with Imp $\beta$ , empty capsids deform, disrupt, and form Cp oligomers. Even  
401 though CpAMs strengthen interdimer contacts, it is not enough to offset the perturbation to  
402 capsid geometry which results in rearrangement of subunits. In addition to the effect of the  
403 CpAMs, the Imp $\beta$  binding site extends beyond the CTD, which could exert a "pulling" force,  
404 partially unfold the dimer, or generally disturb the capsid's quaternary structure (26). This  
405 interaction further compounds the mechanical strain on the capsid.

406 Nucleic acid also impacts CTD and capsid molecular motion. Internal RNA influences the  
407 organization of CTDs (18). Here we observed that differences in RNA content affect capsid  
408 behavior. In this study we observed that CTD exposure was slower with both RNA capsid types  
409 that were tested. Surprisingly, pgRNA-filled capsids were much more protease sensitive than E.  
410 coli RNA-filled capsids. Similarly, our data indicated that no Imp $\beta$  bound to E. coli RNA-filled  
411 capsids (Figure 6A5, 6B5, and 6C5; Supp. Figure 4A1-C4), despite the presence of excess HAPs  
412 and CTD accessibility to proteases (Figure 2A-D and Table 1). This lack of binding to E. coli RNA-  
413 filled capsid was also observed with serine-arginine protein kinases (25). We surmise that  
414 electrostatic RNA-CTD interactions inhibit CTDs from externalizing to the capsid exterior. We  
415 also observed that E. coli RNA capsids do not experience detectable capsid deformation after  
416 treatment with excess HAP12 (Figure 4). We suggest that CTDs electrostatically crosslink dimers  
417 via their interaction with packaged nucleic acid to overcome capsid distortion.

418 Although RNA-filled capsids appeared more stable than empty capsids, their stabilities  
419 are further differentiated by their net internal charges. Our pgRNA-filled capsids have a net  
420 +200 charge: -3200 for the RNA and +3360 for the CTDs (+14 per Cp monomer from 16  
421 arginines, one glutamate, and the C-terminus). Based on our CDMS data, the E. coli RNA-filled  
422 capsids used in these experiments have about 1.4 MDa of RNA, about 4,200 nucleotides from  
423 an undetermined number of polynucleotides, resulting in a net -840 charge (Figure 6A5, 6B5,  
424 and 6C5; Supp. Figure 4A1-C4). With or without excess HAP12, pgRNA capsids showed more  
425 cleavage than E. coli RNA capsids (Figure 2A-D and Table 1). The excess positive charge of  
426 pgRNA-filled capsids indicates that not all CTDs can be protected. Furthermore, the single long  
427 pgRNA may have limited access to CTDs (47); pgRNA is just long enough to coat the interior  
428 surface of the capsid (48). Conversely, the packaged E. coli RNA is present in shorter and longer  
429 sizes that can avoid the constraints of a single polynucleotide (19, 47, 49).

430 We propose that HAP12 and Imp $\beta$  can strain a capsid and that above a threshold of  
431 strain, a ruptured capsid is more stable than an intact one – an accumulated strain model  
432 applied to icosahedral viruses (40, 50). We propose that the free energies of a HAP12 and Imp $\beta$ -  
433 bound capsid in its (ii) strained and (iii) ruptured states are defined as:

434

$$435 \text{ (ii) } \Delta G_{\text{strained}} = N\Delta G_{\text{cont}} + P\Delta G_{\text{HAP12}} + X\Delta G_{\text{Imp}\beta} + (C_{\text{HAP12}}\Delta G_{\text{strain, HAP12}} + C_{\text{Imp}\beta}\Delta G_{\text{strain Imp}\beta})$$

436

$$437 \text{ (iii) } \Delta G_{\text{ruptured}} = (N - N_{\text{broken}})\Delta G_{\text{cont}} + (P - P_{\text{broken}})\Delta G_{\text{HAP12}} + (X - X_{\text{broken}})\Delta G_{\text{Imp}\beta} + (C_{\text{HAP12}}\Delta G_{\text{strain, HAP12}} \\ 438 + C_{\text{Imp}\beta}\Delta G_{\text{strain Imp}\beta})$$

439

440 First consider an intact capsid (equation ii). N accounts for the 240 contacts made by the 120  
441 dimers in a T=4 capsid. Based on structures of capsids with bound HAPs (15, 46), we assume  
442 that HAP12 binds to the 120 B and C sites in a T=4 capsid, noted as  $P_{\text{sites}}$  (15, 46); HAP bound to  
443 the 120 disfavored (and destabilizing) A and D sites is accounted for in  $\Delta G_{\text{strain, HAP12}}$ . The values  
444 for  $\Delta G_{\text{cont}}$  and  $\Delta G_{\text{HAP12}}$ , which are  $-3.1 \text{ kcal}\cdot\text{mol}^{-1}$  and  $-1.9 \text{ kcal}\cdot\text{mol}^{-1}$  per contact, respectively.  
445  $\Delta G_{\text{Imp}\beta}$  is the increment that a bound Imp $\beta$  stabilizes a capsid, presumably by neutralizing some  
446 electrostatic repulsions of the CTDs; empty capsids disassemble and precipitate in the absence  
447 of excess ionic strength (28) or Imp $\beta$ .  $X_{\text{Imp}\beta}$  is the number of bound Imp $\beta$  molecules, less than or  
448 equal to 240. Finally, in an intact capsid, there are strain terms attributable to excess bound  
449 HAP (accounting for geometric effects and binding to disfavored sites) and Imp $\beta$ .

450 A ruptured capsid loses stabilizing and destabilizing energy to reach a minimum  
451 (equation iii).  $N_{\text{broken}}$  represents contacts that are lost after capsids rupture.  $P_{\text{broken}}$  accounts for  
452 lost HAP12 molecules that were initially bound at interdimer interfaces but are released once  
453 their contacts break.  $X_{\text{broken}}$  represents Imp $\beta$ -bound dimers that have disassociated after  
454 rupture. Finally, strain is lost:  $\Delta G_{\text{strain, HAP12}}$  and  $\Delta G_{\text{strain Imp}\beta}$  are influenced by capsid deformation,  
455 so they are multiplied by coefficients  $C_{\text{HAP12}}$  and  $C_{\text{Imp}\beta}$ , respectively. These strain coefficients  
456 range from 0 - 1 and increase nonlinearly as the HAP12 and/or Imp $\beta$  binding rises.

457 With sub-saturating HAP12, icosahedral capsids are favored:  $\Delta G_{\text{strained}} < \Delta G_{\text{ruptured}}$  (Figure  
458 7B and 7D). However, at saturating and super-saturating HAP12,  $\Delta G_{\text{strain, HAP12}}$  is large, and  
459 capsids undergo disruption to relax that strain (Figure 4; Figure 7E). An identical argument holds

460 with high Imp $\beta$ -binding. In conditions where rupture is favored the two C coefficients should be  
461 close to 0, so that  $C_{\text{HAP12}\Delta G_{\text{strain, HAP12}}}$  and  $C_{\text{Imp}\beta\Delta G_{\text{strain Imp}\beta}}$  are relaxed. Saturating HAP12 or  
462 above is required to disturb capsid geometry, and generate  $\Delta G_{\text{strain, HAP12}}$  (Figure 7B). Addition of  
463 Imp $\beta$  compounds the capsid's already strained state further drives the reaction to the ruptured  
464 state (Figure 7F).

465 This paper demonstrates and analyzes the dual antiviral activities of CpAMs and their  
466 synergism with host proteins. Molecules like CpAMs have been documented for their ability to  
467 modulate capsid assembly, but their ability to disrupt capsids have only been implicit until  
468 recently (13-15, 40, 46, 51). Here, we also show that host proteins, in particular Imp $\beta$ , can  
469 contribute to capsid disruption. Destabilizing a capsid adds to the arsenal of mechanisms of  
470 action for small-molecule HBV therapeutics. During the HBV life cycle, empty and rcDNA-filled  
471 capsids interact with host importins and are trafficked to the nucleus (52). When capsids enter  
472 the nuclear pore complex, capsid protein will interact with Nup153, which may facilitate  
473 uncoating (32). Capsid disassembly at inopportune times can impair the virus's ability to  
474 establish infection (16, 17). Furthermore, if rcDNA-containing capsids disassemble in the  
475 cytoplasm, the exposed viral DNA may be detected by the host's innate immune system (e.g  
476 cGAS-STING (53)). Indeed, rcDNA capsids are fragile and may be particularly sensitive to  
477 disruption (43, 44, 54). Because Cp is involved throughout the HBV lifecycle, CpAMs continue to  
478 be a versatile and attractive candidate for developing an efficacious cure for chronic HBV  
479 infection.

480

## 481 **MATERIALS AND METHODS**

482

### 483 **Protein Purification and Preparation**

484 E. coli RNA-filled Cp183 capsids were expressed and purified as previously described  
485 (28). To isolate Cp183 for subsequent experiments, E. coli RNA-filled Cp183 capsids were  
486 dialyzed in 1.5 M guanidine hydrochloride, 0.5 M LiCl, 10 mM DTT, and 20 mM Tris-HCl pH 7.5  
487 (disassembly buffer) at 4°C overnight. The sample was centrifuged at 7,000 g for 10 minutes to  
488 pellet the RNA. Cp183 dimers were purified from the supernatant using a Superose 6 column  
489 (GE) equilibrated in disassembly buffer. To assemble empty capsids, dimers were dialyzed in  
490 0.45 M NaCl, 10 mM DTT, and 20 mM Tris-HCl pH 7.5 (assembly buffer) at 4°C overnight. To  
491 remove unassembled dimers, empty capsids were purified via SEC with a Superose 6 column  
492 that was equilibrated with assembly buffer. To prepare pre-genomic RNA (pgRNA)-filled Cp183  
493 capsids, pgRNA was in vitro transcribed using the MegaScript kit (Thermo-Fisher) with plasmid  
494 1135 (38), which was modified to have a T7 promoter. The modified plasmid 1135 was a gift  
495 from Dr. Dan Loeb. To assemble pgRNA-filled capsids, dimers and pgRNA were mixed in a 120:1  
496 molar ratio and then dialyzed in 0.15 M NaCl, 10 mM DTT, and 20 mM Tris-HCl pH 7.5 at 4°C  
497 overnight. To produce E. coli RNA-filled capsids, stock E. coli RNA capsids were loaded onto a  
498 10-40% continuous sucrose gradient and centrifuged at 40,000 rpm for 5 hours; the capsid  
499 band was extracted and dialyzed into assembly buffer. Imp $\beta$  expression and purification  
500 protocols were adapted from Chen et al. (26).

501

### 502 **Treatment of HBV Capsids with the CpAM HAP12**

503 For HAP12 treatment, empty and pgRNA-filled capsids were incubated with HAP12 for 2  
504 hours away from light before they were used for experiments. To prepare drug stock samples,  
505 HAP12 was resuspended in 100% DMSO. HAP12 stocks contain a racemic mixture of 50% active  
506 and 50% inactive molecules; we always refer to HAP12 concentrations in terms of the whole  
507 racemic mixture. These concentrations correspond to the following HAP12 to dimer molar  
508 ratios: 2:1, 4:1, and 8:1, respectively. For example, at saturating concentration, there would be  
509 4 HAP12 molecules for every 1 dimer, which corresponds to 1 active HAP12 molecule per  
510 pocket. For control samples, capsid samples were incubated with DMSO.

511

### 512 **Proteolysis of HBV Capsids**

513 The limited proteolysis assay performed in this paper was adapted from a previously  
514 published work (28). Reaction samples with empty, pgRNA-filled, and E. coli RNA-filled capsids  
515 were diluted in 0.5 mM NaCl, 10 mM  $\beta$ -mercaptoethanol, and 80 mM Tris-HCl pH 7.5 and  
516 incubated with 0.04 $\mu$ M sequence grade modified trypsin (Promega) for specific times.  
517 Proteolysis was quenched with 4x Laemmli buffer and heating at 95°C for 6 minutes. Samples  
518 were then analyzed by SDS-PAGE on a 20% denaturing polyacrylamide gel, containing 0.4%  
519 (v/v) 2,2,2-trichloroethanol (TCE) to support direct fluorescent detection of protein samples  
520 (55). Gels were imaged with a ChemiDoc<sup>TM</sup> (BioRad). Protein bands were quantified using the  
521 Fiji software (56). Each data point is the average of three independent trials with a  
522 corresponding error bar. Curve-fitting for CTD exposure kinetics was performed using the Solver  
523 function on Excel. For LC-MS, reactions were quenched by addition of glacial acetic acid.

524

### 525 **LC-MS of Proteolyzed Cp183**

526 Two separate liquid chromatography-mass spectrometry (LC-MS) methods were used to  
527 characterize the peptides generated in the limited proteolysis experiments. The first focused on  
528 peptides with a molecular weight less than 3 kDa. Before analysis, samples with peptides were  
529 passed through a 3 kDa molecular weight cut off filter (PALL) to remove larger peptides and  
530 undigested protein. The final concentration of peptides was approximately 0.1 mg/mL. 1  $\mu$ L of  
531 the peptide mixture was injected onto a Dionex 3000 nano-HPLC (Thermo-Fisher) coupled to a  
532 maXis Impact QTOF (Bruker Daltonics). Nano LC-MS/MS analysis was performed as as  
533 previously described. (57, 58). Briefly, LC was carried out using an Acclaim PepMap C18 reverse  
534 phase column (300 $\mu$ m x 5mm) using a slow gradient: 0-2.5 min, 3% B; 2.5-20 min, 3-30% B; 20-  
535 23 min, 30-80% B; 23-25 mins, 80% B; 25-28 mins, 80-3% B; 28-30 mins, 3% B where solvent A =  
536 0.1% formic acid (FA, Sigma) in water (Thermo-Fisher) and solvent B = 0.1% FA in acetonitrile  
537 (Thermo-Fisher). The peptides were analyzed using PeptideShaker (59) coupled to SearchGUI  
538 (60).

539 LC-MS of peptides greater than 3 kDa was performed using an Agilent 1290 UPLC series  
540 LC coupled to a micrOTOF (Bruker Daltonics). 10  $\mu$ L of the peptide mixture at approximately 0.1  
541 mg/mL were injected onto the LC. The LC was carried out using a Phenomenex Onyx Monolithic  
542 C18 reverse phase column (100 x 2mm) at 50° C with the flow rate of 400  $\mu$ L/min. The following  
543 gradient was used: 1.0 min, 10% B; 1.0-8.0 min, 10-70% B; 8.0-8.5 min, 70-90% B; 8.5-9.0 min,  
544 90-10% B; 9.0-10.0 min, 10% B solvent A = 0.1% formic acid (FA, Sigma) in water (Thermo-  
545 Fisher) and solvent B = 0.1% FA in acetonitrile (Thermo-Fisher). MS settings were as follows:  
546 nebulizer set to 5.0 bar, drying gas at 7.0 L/min, drying temperature at 200 °C, and capillary

547 voltage at 4.5 kV. The capillary exit was set at 100V, skimmer 1 at 50V, hexapole 1 at 23V,  
548 hexapole RF at 300 Vpp, and skimmer 2 at 22V. Data analysis was carried out using Bruker  
549 DataAnalysis with MaximumEntropy.

550

### 551 **HBV Capsid and Importin $\beta$ Binding Experiments**

552 Imp $\beta$  was passed through a Superose 6 column to exchange the buffer into 0.5 M NaCl,  
553 10 mM DTT, and 20 mM Tris-HCl pH 7.5. Empty and E. coli RNA-filled capsids were mixed with  
554 Imp $\beta$  in a 1:80 ratio. Then, these samples were dialyzed into 0.15 M NaCl, 10 mM DTT, and 20  
555 mM Tris-HCl pH 7.5 at 4°C overnight to allow binding. The resulting complexes were analyzed  
556 via SEC, SDS-PAGE, CDMS, and TEM. For SEC, complexes were resolved using a Superose 6  
557 column and the overnight dialysis buffer was the running buffer. SDS-PAGE was performed with  
558 a denaturing polyacrylamide gel (4% stacking and 16% resolving).

559

### 560 **Transmission Electron Microscopy**

561 For negative stain TEM of empty capsid morphology, capsids were mixed with 6% (w/v)  
562 ammonium molybdate and 0.5% (w/v) Trehalose and applied to glow-discharged continuous  
563 carbon grids. For studies where sample flattening was not critical, samples were first applied to  
564 grids and then stained with 0.45% (w/v) uranyl formate or 2% (w/v) uranyl acetate. All grids  
565 were imaged using the JEOL 1400 FS microscope at 120 kV and at magnification 50,000x.

566

### 567 **Cryo-electron Tomography**

568 To prepare cryo-EM specimens, a drop of 4  $\mu$ L of sample mixture was applied to a glow-  
569 discharged 300-mesh Quantifoil<sup>®</sup> R2/2 holey carbon grid. The grid was plunged into a liquid  
570 ethane bath cooled by liquid nitrogen, using a Thermo Fisher Scientific (TFS) Vitrobot Mark IV.  
571 The frozen hydrated cryo-EM grid was clipped into a cartridge and then transferred into a  
572 cassette before loading into a TFS 300-kV Titan Krios equipped with Gatan BioContinuum<sup>™</sup>  
573 energy filter, using a K3 direct electron detector camera. Data collection was set up using TFS  
574 Tomography software (v 4) under counting mode. The nominal magnification was 53,000x  
575 (equal to 1.7 Å per pixel), and the illumination had a dose rate of 0.7 e<sup>-</sup>/Å<sup>2</sup>. The zero-loss peak  
576 was aligned for each tilt-series, using an energy slit of 20 eV. Tilt series were acquired using a  
577 bidirectional scheme from -60° to 60° with tilt step at 2°. Therefore, the total accumulated dose  
578 is ~ 42.7 e<sup>-</sup>/Å<sup>2</sup>. Tilt series alignment, CTF correction, and tomogram reconstruction were  
579 performed using IMOD (v 4.9.12) (61). The final 3D reconstruction was generated with data  
580 binned at 4. Nonlinear anisotropic diffusion was applied to the final reconstruction to reduce  
581 noise (62).

582

### 583 **Charge-detection Mass Spectrometry (CDMS)**

584 CDMS is a single particle technique in which the mass-to-charge ratio ( $m/z$ ) and charge  
585 ( $z$ ) of each ion are measured simultaneously. Multiplying the  $m/z$  by the charge gives the mass  
586 of an ion. Measurements are performed on many individual ions to generate a mass  
587 distribution. This allows molecular weight distributions to be measured for large (greater than 1  
588 MDa) and heterogenous species. These species cannot usually be analyzed with traditional  
589 mass spectrometry methods that have an effective upper limit of about 1 MDa. In this work, a  
590 homebuilt CDMS instrument, described previously (63-65), was used. Briefly, the analyte is

591 ionized by a nano-electrospray (Advion Triversa Nanomate). The ions enter the instrument  
592 through a metal capillary and pass three regions of differential pumping. They are then focused  
593 into a dual hemispherical deflection energy analyzer which transmits a narrow band of ion  
594 energies centered around the nominal ion energy of 100 eV/charge. The transmitted ions are  
595 focused into an electrostatic linear ion trap, where they are trapped when potential barriers are  
596 raised at both ends. As the ion oscillates back and forth in the trap, it passes through a  
597 conducting cylinder. The ion induces an equal but opposite charge on this cylinder; the signal  
598 from the induced charge is amplified, digitized and analyzed by fast Fourier Transforms (65).  
599 The fundamental frequency is proportional to the  $m/z$  of the ion, while the amplitude of the  
600 signal is proportional to the charge of the ion. All mass spectra were generated using a 100 ms  
601 trapping time. Typical spectra contain thousands of individual ion measurements and take 30-  
602 50 min to collect. Before CDMS analysis, empty and *E. coli* RNA-filled capsids samples were  
603 buffer exchanged into a volatile buffer, 150 mM ammonium formate pH 7.5 at 4°C. The CDMS  
604 data presented in this work includes mass spectra, charge versus mass plots, and 3D heatmaps.  
605 In addition, all charge versus mass plots contained Rayleigh limit curves. The Rayleigh limit is a  
606 model that predicts the surface charge of a water droplet of a certain mass (41, 66-68).

607

608

#### 609 **ACKNOWLEDGEMENT**

610 This research was supported by grants R01-AI144022 and R01-AI118933 from the NIH to AZ.  
611 We also acknowledge the Physical Biochemistry Instrumentation Facility and the IU Electron  
612 Microscopy Center, both which are supported the Indiana CTSI.

613 **References**

614

- 615 1. Graber-Stiehl I. 2018. The silent epidemic killing more people than HIV, malaria or TB. *Nature*  
616 564:24-26.
- 617 2. Polaris Observatory C. 2018. Global prevalence, treatment, and prevention of hepatitis B virus  
618 infection in 2016: a modelling study. *Lancet Gastroenterol Hepatol* 3:383-403.
- 619 3. Usha V, Nagraj M, Zhanying H, Haiqun B, Yanming D, Jin H, Jinhong C, Ju-Tao G. 2020. Targeting  
620 the multifunctional HBV core protein as a potential cure for chronic hepatitis B. *Antiviral*  
621 *Research* 182:104917.
- 622 4. Venkatakrishnan B, Zlotnick A. 2016. The Structural Biology of Hepatitis B Virus: Form and  
623 Function. *Annual Reviews of Virology* 3:429-451.
- 624 5. Beck J, Nassal M. 2007. Hepatitis B virus replication. *World J Gastroenterol* 13:48-64.
- 625 6. Prange R. 2012. Host factors involved in hepatitis B virus maturation, assembly, and egress. *Med*  
626 *Microbiol Immunol* 201:449-61.
- 627 7. Ceres P, Zlotnick A. 2002. Weak protein-protein interactions are sufficient to drive assembly of  
628 hepatitis B virus capsids. *Biochemistry* 41:11525-31.
- 629 8. Ning X, Nguyen D, Mentzer L, Adams C, Lee H, Ashley R, Hafenstein S, Hu J. 2011. Secretion of  
630 genome-free hepatitis B virus--single strand blocking model for virion morphogenesis of para-  
631 retrovirus. *PLoS pathogens* 7:e1002255.
- 632 9. Steven AC, Conway JF, Cheng N, Watts NR, Belnap DM, Harris A, Stahl SJ, Wingfield PT. 2005.  
633 Structure, assembly, and antigenicity of hepatitis B virus capsid proteins. *Adv Virus Res* 64:125-  
634 64.
- 635 10. Schlicksup CJ, Zlotnick A. 2020. Viral structural proteins as targets for antivirals. *Curr Opin Virol*  
636 45:43-50.
- 637 11. Deres K, Schroder CH, Paessens A, Goldmann S, Hacker HJ, Weber O, Kramer T, Niewohner U,  
638 Pleiss U, Stoltefuss J, Graef E, Koletzki D, Masantschek RN, Reimann A, Jaeger R, Gross R,  
639 Beckermann B, Schlemmer KH, Haebich D, Rubsamen-Waigmann H. 2003. Inhibition of hepatitis  
640 B virus replication by drug-induced depletion of nucleocapsids. *Science* 299:893-6.
- 641 12. Wang XY, Wei ZM, Wu GY, Wang JH, Zhang YJ, Li J, Zhang HH, Xie XW, Wang X, Wang ZH, Wei L,  
642 Wang Y, Chen HS. 2012. In vitro inhibition of HBV replication by a novel compound, GLS4, and its  
643 efficacy against adefovir-dipivoxil-resistant HBV mutations. *Antiviral therapy* 17:793-803.
- 644 13. Bourne C, Lee S, Venkataiah B, Lee A, Korba B, Finn MG, Zlotnick A. 2008. Small-Molecule  
645 Effectors of Hepatitis B Virus Capsid Assembly Give Insight into Virus Life Cycle. *J Virol* 82:10262-  
646 10270.
- 647 14. Stray SJ, Zlotnick A. 2006. BAY 41-4109 has multiple effects on Hepatitis B virus capsid assembly.  
648 *J Mol Recognit* 19:542-548.
- 649 15. Schlicksup CJ, Wang JC, Francis S, Venkatakrishnan B, Turner WW, VanNieuwenhze M, Zlotnick  
650 A. 2018. Hepatitis B virus core protein allosteric modulators can distort and disrupt intact  
651 capsids. *Elife* 7:pii: e31473.
- 652 16. Berke JM, Dehertogh P, Vergauwen K, Mostmans W, Vandyck K, Raboisson P, Pauwels F. 2020.  
653 Antiviral Properties and Mechanism of Action Studies of the Hepatitis B Virus Capsid Assembly  
654 Modulator JNJ-56136379. *Antimicrob Agents Chemother* 64:pii: e02439-19.
- 655 17. Berke JM, Dehertogh P, Vergauwen K, Van Damme E, Mostmans W, Vandyck K, Pauwels F. 2017.  
656 Capsid Assembly Modulators Have a Dual Mechanism of Action in Primary Human Hepatocytes  
657 Infected with Hepatitis B Virus. *Antimicrob Agents Chemother* 61.
- 658 18. Wang JC, Dhasan MS, Zlotnick A. 2012. Structural organization of pregenomic RNA and the  
659 carboxy-terminal domain of the capsid protein of hepatitis B virus. *PLoS pathogens* 8:e1002919.



- 660 19. Birnbaum F, Nassal M. 1990. Hepatitis B virus nucleocapsid assembly: primary structure  
661 requirements in the core protein. *JVirol* 64:3319-3330.
- 662 20. Nassal M. 1992. The arginine-rich domain of the hepatitis B virus core protein is required for  
663 pregenome encapsidation and productive viral positive-strand DNA synthesis but not for virus  
664 assembly. *JVirol* 66:4107-4116.
- 665 21. Lewellyn EB, Loeb DD. 2011. The arginine clusters of the carboxy-terminal domain of the core  
666 protein of hepatitis B virus make pleiotropic contributions to genome replication. *Journal of*  
667 *Virology* 85:1298-309.
- 668 22. Kann M, Schmitz A, Rabe B. 2007. Intracellular transport of hepatitis B virus. *World J*  
669 *Gastroenterol* 13:39-47.
- 670 23. Li HC, Huang EY, Su PY, Wu SY, Yang CC, Lin YS, Chang WC, Shih C. 2010. Nuclear export and  
671 import of human hepatitis B virus capsid protein and particles. *PLoS pathogens* 6:e1001162.
- 672 24. Yeh CT, Liaw YF, Ou JH. 1990. The arginine-rich domain of hepatitis B virus precore and core  
673 proteins contains a signal for nuclear transport. *JVirol* 64:6141-6147.
- 674 25. Chen C, Wang JC-Y, Zlotnick A. 2011. A kinase chaperones hepatitis B virus capsid assembly and  
675 captures capsid dynamics in vitro. *PLoS pathogens* 7:e1002388.
- 676 26. Chen C, Wang JC, Pierson EE, Keifer DZ, Delaleau M, Gallucci L, Cazenave C, Kann M, Jarrold MF,  
677 Zlotnick A. 2016. Importin beta Can Bind Hepatitis B Virus Core Protein and Empty Core-Like  
678 Particles and Induce Structural Changes. *PLoS Pathog* 12:e1005802.
- 679 27. Kann M, Sodeik B, Vlachou A, Gerlich WH, Helenius A. 1999. Phosphorylation-dependent binding  
680 of hepatitis B virus core particles to the nuclear pore complex. *J Cell Biol* 145:45-55.
- 681 28. Selzer L, Kant R, Wang JC, Bothner B, Zlotnick A. 2015. Hepatitis B Virus Core Protein  
682 Phosphorylation Sites Affect Capsid Stability and Transient Exposure of the C-terminal Domain. *J*  
683 *Biol Chem* 290:28584-93.
- 684 29. Zhao Q, Hu Z, Cheng J, Wu S, Luo Y, Chang J, Hu J, Guo JT. 2018. Hepatitis B virus core protein  
685 dephosphorylation occurs during pregenomic RNA encapsidation. *J Virol* doi:10.1128/JVI.02139-  
686 17.
- 687 30. Heger-Stevic J, Zimmermann P, Lecoq L, Bottcher B, Nassal M. 2018. Hepatitis B virus core  
688 protein phosphorylation: Identification of the SRPK1 target sites and impact of their occupancy  
689 on RNA binding and capsid structure. *PLoS Pathog* 14:e1007488.
- 690 31. Rabe B, Vlachou A, Pante N, Helenius A, Kann M. 2003. Nuclear import of hepatitis B virus  
691 capsids and release of the viral genome. *PNAS* 100:9849-9854.
- 692 32. Schmitz A, Schwarz A, Foss M, Zhou L, Rabe B, Hoellenriegel J, Stoeber M, Pante N, Kann M.  
693 2010. Nucleoporin 153 arrests the nuclear import of hepatitis B virus capsids in the nuclear  
694 basket. *PLoS Pathog* 6:e1000741.
- 695 33. Rabe B, Delaleau M, Bischof A, Foss M, Sominskaya I, Pumpens P, Cazenave C, Castroviejo M,  
696 Kann M. 2009. Nuclear entry of hepatitis B virus capsids involves disintegration to protein  
697 dimers followed by nuclear reassociation to capsids. *PLoS Pathog* 5:e1000563.
- 698 34. Kann M, Thomssen R, Kochel HG, Gerlich WH. 1993. Characterization of the endogenous protein  
699 kinase activity of the hepatitis B virus. *Arch Virol Suppl* 8:53-62.
- 700 35. Osseman Q, Kann M. 2017. Intracytoplasmic Transport of Hepatitis B Virus Capsids. *Methods*  
701 *Mol Biol* 1540:37-51.
- 702 36. Cingolani G, Petosa C, Weis K, Muller CW. 1999. Structure of importin-beta bound to the IBB  
703 domain of importin-alpha. *Nature* 399:221-9.
- 704 37. Hilmer JK, Zlotnick A, Bothner B. 2008. Conformational Equilibria and Rates of Localized Motion  
705 within Hepatitis B Virus Capsids. *J Mol Biol* 375:581-594.

- 706 38. Porterfield JZ, Dhason MS, Loeb DD, Nassal M, Stray SJ, Zlotnick A. 2010. Full-Length Hepatitis B  
707 Virus Core Protein Packages Viral and Heterologous RNA with Similarly High Levels of  
708 Cooperativity. *Journal of Virology* 84:7174-7184.
- 709 39. Chua PK, Tang FM, Huang JY, Suen CS, Shih C. 2010. Testing the balanced electrostatic  
710 interaction hypothesis of hepatitis B virus DNA synthesis by using an in vivo charge rebalance  
711 approach. *Journal of Virology* 84:2340-51.
- 712 40. Schlicksup CJ, Laughlin P, Dunkelbarger S, Wang JC, Zlotnick A. 2020. Local Stabilization of  
713 Subunit-Subunit Contacts Causes Global Destabilization of Hepatitis B Virus Capsids. *ACS Chem*  
714 *Biol* 15:1708-1717.
- 715 41. Rayleigh L. 1882. XX. On the equilibrium of liquid conducting masses charged with electricity.  
716 *Philos Mag* 14:184-186.
- 717 42. Lutomski CA, Gordon SM, Remaley AT, Jarrold MF. 2018. Resolution of Lipoprotein Subclasses by  
718 Charge Detection Mass Spectrometry. *Anal Chem* 90:6353-6356.
- 719 43. Cui X, Ludgate L, Ning X, Hu J. 2013. Maturation-associated destabilization of hepatitis B virus  
720 nucleocapsid. *J Virol* 87:11494-503.
- 721 44. Dhason MS, Wang JC, Hagan MF, Zlotnick A. 2012. Differential assembly of Hepatitis B Virus core  
722 protein on single- and double-stranded nucleic acid suggest the dsDNA-filled core is spring-  
723 loaded. *Virology* 430:20-9.
- 724 45. Stray SJ, Bourne CR, Punna S, Lewis WG, Finn MG, Zlotnick A. 2005. A  
725 heteroaryldihydropyrimidine activates and can misdirect hepatitis B virus capsid assembly. *Proc*  
726 *Natl Acad Sci U S A* 102:8138-43.
- 727 46. Venkatakrishnan B, Katen SP, Francis S, Chirapu S, Finn MG, Zlotnick A. 2016. Hepatitis B Virus  
728 Capsids Have Diverse Structural Responses to Small-Molecule Ligands Bound to the  
729 Heteroaryldihydropyrimidine Pocket. *J Virol* 90:3994-4004.
- 730 47. Rudnick J, Bruinsma R. 2005. Icosahedral packing of RNA viral genomes. *Phys Rev Lett*  
731 94:038101.
- 732 48. Nair S, Zlotnick A. 2018. Asymmetric Modification of Hepatitis B Virus (HBV) Genomes by an  
733 Endogenous Cytidine Deaminase inside HBV Cores Informs a Model of Reverse Transcription. *J*  
734 *Virol* 92:pii: e02190-17.
- 735 49. Dykeman EC, Grayson NE, Toropova K, Ranson NA, Stockley PG, Twarock R. 2011. Simple rules  
736 for efficient assembly predict the layout of a packaged viral RNA. *Journal of molecular biology*  
737 408:399-407.
- 738 50. Yau ST, Thomas BR, Galkin O, Gliko O, Vekilov PG. 2001. Molecular mechanisms of  
739 microheterogeneity-induced defect formation in ferritin crystallization. *Proteins* 43:343-52.
- 740 51. Katen SP, Tan Z, Chirapu SR, Finn MG, Zlotnick A. 2013. Assembly-directed antivirals  
741 differentially bind quasiequivalent pockets to modify hepatitis B virus capsid tertiary and  
742 quaternary structure. *Structure* 21:1406-16.
- 743 52. Seeger C, Mason WS. 2015. Molecular biology of hepatitis B virus infection. *Virology* 479-  
744 480:672-86.
- 745 53. Sun L, Wu J, Du F, Chen X, Chen ZJ. 2013. Cyclic GMP-AMP synthase is a cytosolic DNA sensor  
746 that activates the type I interferon pathway. *Science* 339:786-91.
- 747 54. Guo F, Zhao Q, Sheraz M, Cheng J, Qi Y, Su Q, Cuconati A, Wei L, Du Y, Li W, Chang J, Guo JT.  
748 2017. HBV core protein allosteric modulators differentially alter cccDNA biosynthesis from de  
749 novo infection and intracellular amplification pathways. *PLoS Pathog* 13:e1006658.
- 750 55. Chopra A, Willmore WG, Biggar KK. 2019. Protein quantification and visualization via ultraviolet-  
751 dependent labeling with 2,2,2-trichloroethanol. *Sci Rep* 9:13923.

- 752 56. Schindelin J, Arganda-Carreras I, Frise E, Kaynig V, Longair M, Pietzsch T, Preibisch S, Rueden C,  
753 Saalfeld S, Schmid B, Tinevez JY, White DJ, Hartenstein V, Eliceiri K, Tomancak P, Cardona A.  
754 2012. Fiji: an open-source platform for biological-image analysis. *Nat Methods* 9:676-82.
- 755 57. Burns EE, Keith BK, Refai MY, Bothner B, Dyer WE. 2017. Proteomic and biochemical assays of  
756 glutathione-related proteins in susceptible and multiple herbicide resistant *Avena fatua* L. *Pestic*  
757 *Biochem Physiol* 140:69-78.
- 758 58. Ledbetter RN, Garcia Costas AM, Lubner CE, Mulder DW, Tokmina-Lukaszewska M, Artz JH,  
759 Patterson A, Magnuson TS, Jay ZJ, Duan HD, Miller J, Plunkett MH, Hoben JP, Barney BM, Carlson  
760 RP, Miller AF, Bothner B, King PW, Peters JW, Seefeldt LC. 2017. The Electron Bifurcating  
761 FixABCX Protein Complex from *Azotobacter vinelandii*: Generation of Low-Potential Reducing  
762 Equivalents for Nitrogenase Catalysis. *Biochemistry* 56:4177-4190.
- 763 59. Vaudel M, Burkhardt JM, Zahedi RP, Oveland E, Berven FS, Sickmann A, Martens L, Barsnes H.  
764 2015. PeptideShaker enables reanalysis of MS-derived proteomics data sets. *Nat Biotechnol*  
765 33:22-4.
- 766 60. Barsnes H, Vaudel M. 2018. SearchGUI: A Highly Adaptable Common Interface for Proteomics  
767 Search and de Novo Engines. *J Proteome Res* 17:2552-2555.
- 768 61. Kremer JR, Mastronarde DN, McIntosh JR. 1996. Computer visualization of three-dimensional  
769 image data using IMOD. *J Struct Biol* 116:71-6.
- 770 62. Frangakis AS, Hegerl R. 2001. Noise reduction in electron tomographic reconstructions using  
771 nonlinear anisotropic diffusion. *J Struct Biol* 135:239-50.
- 772 63. Contino NC, Jarrold MF. 2013. Charge detection mass spectrometry for single ions with a limit of  
773 detection of 30 charges. *Int J Mass Spect* 345–347:153–159.
- 774 64. Draper BE, Anthony SN, Jarrold MF. 2018. The FUNPET-a New Hybrid Ion Funnel-Ion Carpet  
775 Atmospheric Pressure Interface for the Simultaneous Transmission of a Broad Mass Range. *J Am*  
776 *Soc Mass Spectrom* 29:2160-2172.
- 777 65. Draper BE, Jarrold MF. 2019. Real-Time Analysis and Signal Optimization for Charge Detection  
778 Mass Spectrometry. *Journal of The American Society for Mass Spectrometry* 30:898-904.
- 779 66. de la Mora JF. 2000. Electrospray ionization of large multiply charged species proceeds via Dole's  
780 charge residue mechanism. *Anal Chim Acta* 406:93-104.
- 781 67. Konermann L, Ahadi E, Rodriguez AD, Vahidi S. 2013. Unraveling the mechanism of electrospray  
782 ionization. *Anal Chem* 85:2-9.
- 783 68. Keifer D, Motwani T, Teschke CM, Jarrold MF. 2016. Acquiring structural information on virus  
784 particles via charge detection mass spectrometry. *J Am Soc Mass Spectrom* 27:1028-1036.

785

786 **Table**

787 Table 1. Curve fitting of CTD proteolysis data as a two first order decays.

| <b>Sample</b>                               | <b>Population 1<br/>(mole fraction)</b> | <b>Population 1<br/><math>t_{1/2}</math> (min)</b> | <b>Population 2<br/>(mole fraction)</b> | <b>Population 2<br/><math>t_{1/2}</math> (min)</b> | <b>RMSD</b> |
|---------------------------------------------|-----------------------------------------|----------------------------------------------------|-----------------------------------------|----------------------------------------------------|-------------|
| Empty Capsid                                | 0.37                                    | 0.42                                               | 0.43                                    | 6.58                                               | 0.0065      |
| Empty + Sub-saturating HAP12                | 0.35                                    | 0.35                                               | 0.50                                    | 9.37                                               | 0.0105      |
| Empty + Saturating HAP12                    | 0.28                                    | 0.40                                               | 0.60                                    | 5.51                                               | 0.0132      |
| Empty + Super-saturating HAP12              | 0.74                                    | 0.47                                               | 0.25                                    | 2.40                                               | 0.0033      |
| pgRNA-filled Capsid                         | 0.21                                    | 0.36                                               | 0.65                                    | 9.83                                               | 0.0101      |
| pgRNA Capsid + Super-saturating HAP12       | 0.24                                    | 0.29                                               | 0.72                                    | 7.73                                               | 0.0099      |
| E. coli RNA-filled Capsid                   | 0.24                                    | 0.28                                               | 0.12                                    | 13.97                                              | 0.0041      |
| E. coli RNA Capsid + Super-saturating HAP12 | 0.20                                    | 0.05                                               | 0.53                                    | 15.51                                              | 0.0068      |

788 Cp183 cleavage is in terms of populations cleaved rapidly, cleaved slowly, and uncleaved. The  
789 mole fractions of these three populations sum to 1.0.

790

791 Main Figures

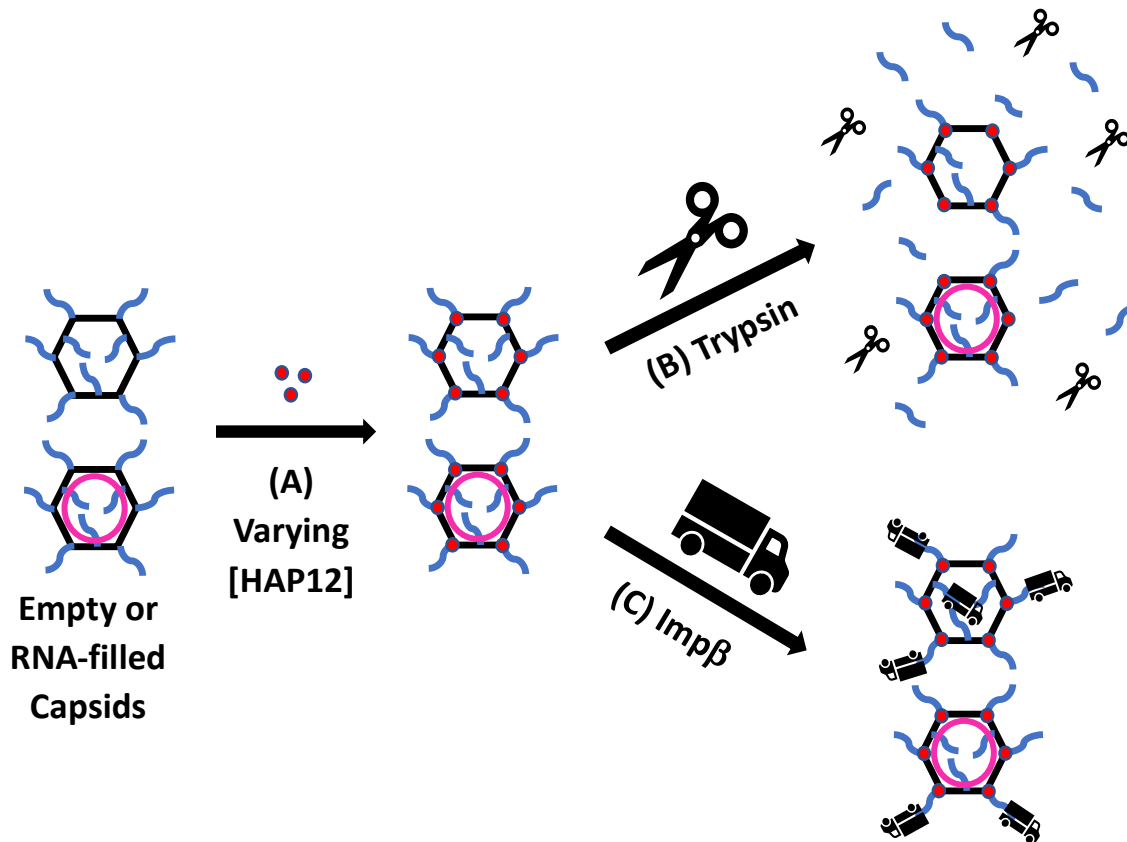

792

793 **Figure 1. Capsid proteolysis and Impβ binding experimental schematic.** (A) Empty and RNA-  
794 filled capsids were initially treated with varying concentrations of the CpAM HAP12 and then  
795 interrogated by proteolysis or Impβ-binding. Trypsin is represented by scissors, and Impβ is  
796 represented by trucks. HAP12-treatment was characterized in terms of “saturation”: at  
797 saturating HAP12 concentrations, there is one active HAP12 molecule for every HAP pocket. (B)  
798 HAP12-treated empty, pgRNA-filled, and E. coli RNA-filled capsids were digested with trypsin  
799 and reactions were quenched before proteolyzed products were resolved using SDS-PAGE and  
800 LC-MS. (C). HAP12-treated empty and E. coli RNA-filled capsids were mixed with Impβ and  
801 dialyzed into a low NaCl concentration buffer to allow binding. Impβ-bound capsids were  
802 analyzed using SEC, SDS-PAGE, TEM, and CDMS.

803

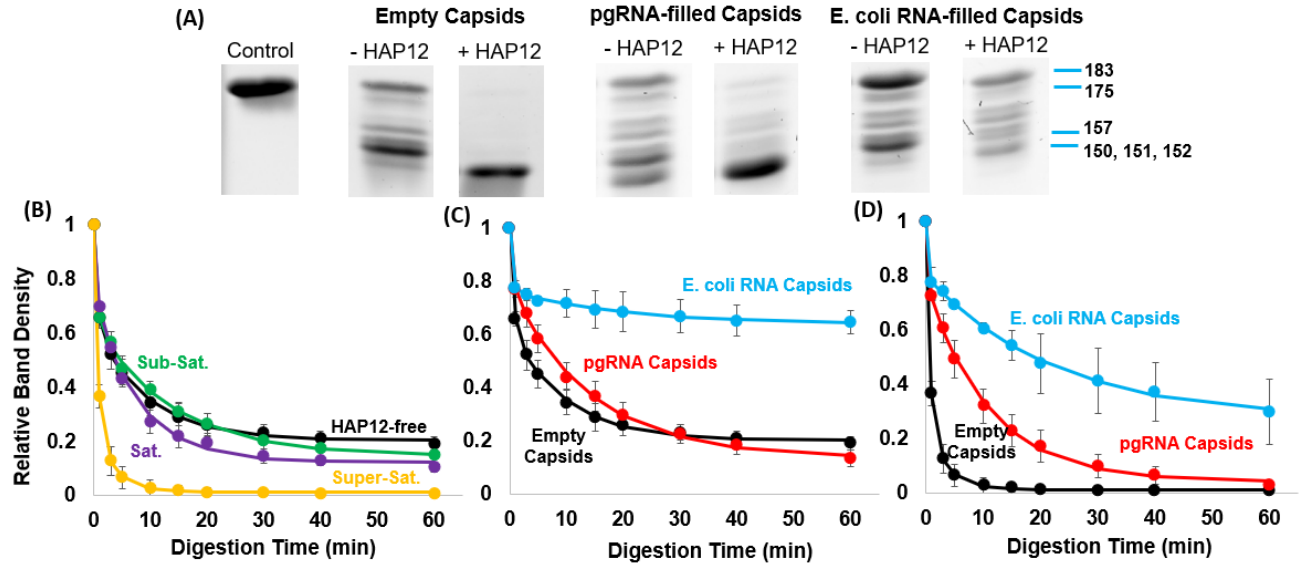

804  
 805 **Figure 2. Excess HAP12 changed the proteolysis pattern and led to faster and more complete**  
 806 **proteolysis of CTDs.** CTD exposure was measured as a function of trypsin digestion. Empty,  
 807 pgRNA-filled, and E. coli RNA-filled capsids were treated with HAP12 and then exposed to  
 808 trypsin at room temperature. Capsid and trypsin concentrations were 7  $\mu\text{M}$  and 0.04  $\mu\text{M}$ ,  
 809 respectively. Reactions were quenched by acidification and analyzed by SDS-PAGE and LC-MS.  
 810 (A) SDS-PAGE of proteolyzed, drug-free capsids (-HAP12) and capsids treated with super-  
 811 saturating concentration of HAP12 (+HAP12) capsids; these samples were digested for 60 min.  
 812 Prominent bands, identified by LC-MS, are labeled on the rightmost image. Untreated capsids  
 813 retained substantive fractions of intact Cp183. With excess HAP12, the CTDs of empty and  
 814 pgRNA-filled capsids were almost completely digested; E. coli RNA-filled capsids exhibited  
 815 about equal distribution of different proteolyzed bands. (B, C, D) Time courses of cleavage at (B)  
 816 varying HAP12 concentrations, (C) varying capsid content (empty, pgRNA-filled, and E. coli RNA-  
 817 filled) without HAP12, and (D) varying capsid content with super-saturating HAP12. The relative  
 818 band density is defined as the optical density of undigested Cp183 divided by the total optical  
 819 density of the lane.

820  
 821

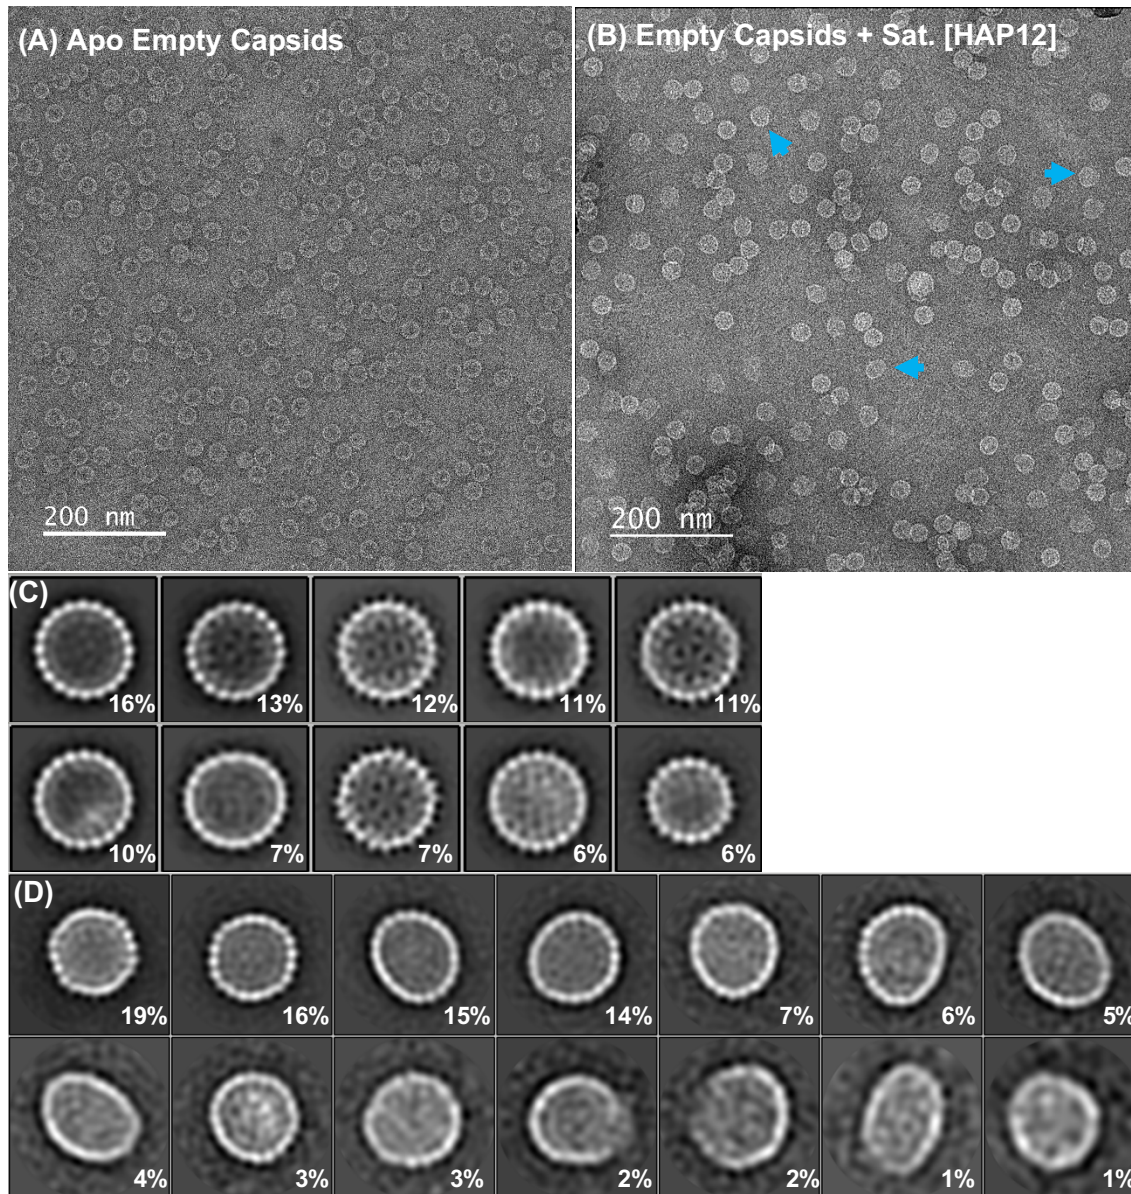

822 **Figure 3. HAP12-treatment causes capsid deformation.** Untreated (A,C) and treated (B,D)  
823 empty capsids were compared by negative stain EM. (A) A TEM of capsids with no HAP12 shows  
824 a narrow range of diversity. (B) A TEM of capsids in saturating HAP12 shows that damage to  
825 capsids is evident even without averaging. Blue arrows indicated deformed capsids. Samples  
826 were stained with ammonium molybdate with trehalose added to minimize sample flattening  
827 and distortion due to drying. (C) Class averages of 5,307 nontreated-capsids from negative  
828 stained TEM show a circular cross section. (D) Class averages of 1,160 capsids treated for 2  
829 hours with saturating HAP12, at 25°C, show elliptical, faceted, and broken morphology; capsid  
830 deformation by HAP12 is nearly universal but irregular. Population of each class is shown in the  
831 bottom right corner.

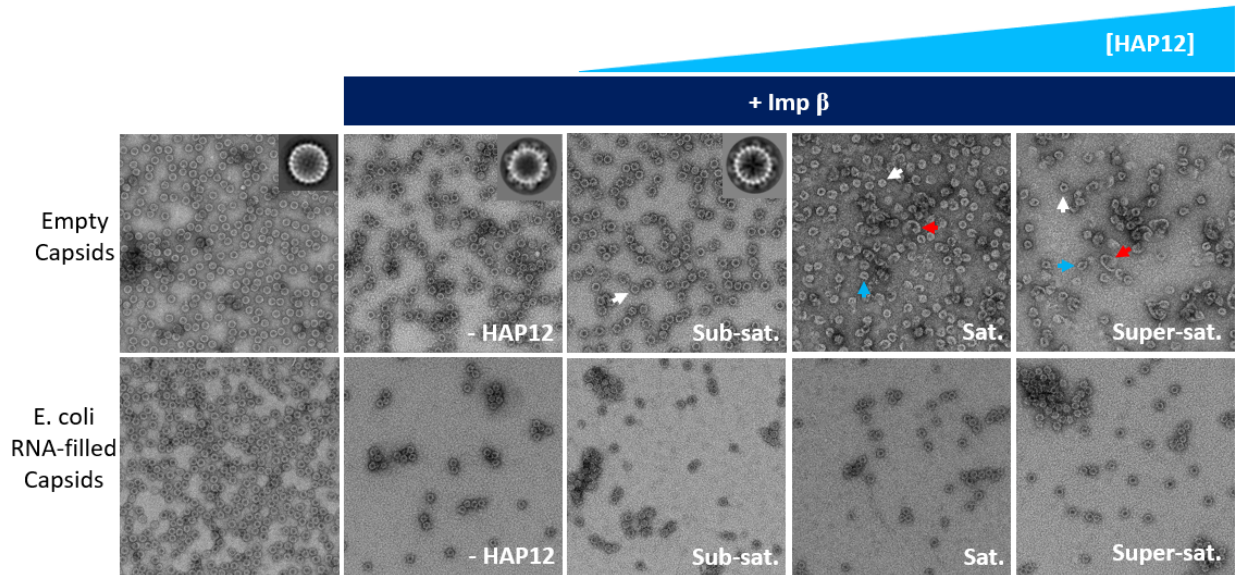

832  
833

834 **Figure 4. HAP12 with Imp $\beta$  led to disruption of empty capsids.** Empty and E. coli-RNA-filled  
835 capsids were mixed with Imp $\beta$  so that there were 80 Imp $\beta$  per capsid (Cp183 dimer and Imp $\beta$   
836 concentrations were 11.9  $\mu$ M and 8  $\mu$ M respectively), dialyzed into low salt (150 mM NaCl) to  
837 facilitate binding, and visualized by negative stain TEM. Relative HAP12 concentrations are  
838 shown in white. Arrows highlight capsids of specified morphology: white arrows – round,  
839 “normal”, capsids; blue arrows – deformed/intact capsids; red arrows – broken capsids/aberrant  
840 structures. Drug-free empty capsids appeared spherical and intact, which is reflected in its  
841 representative 2D particle projection (inset). After addition of Imp $\beta$ , capsids with no HAP12 or  
842 sub-saturating HAP12 concentrations similarly appeared round and intact; each have  
843 representative cross-sections that show well-ordered, external Imp $\beta$  density (insets and Supp.  
844 Figure 2). Introduction of Imp $\beta$  and saturating or higher concentrations of HAP12 to empty  
845 capsids produced broken capsids and heterogenous complexes (see also Figure 5). E. coli RNA-  
846 Filled capsids remained morphologically unchanged even with treatment with high  
847 concentration of HAP12.

848  
849



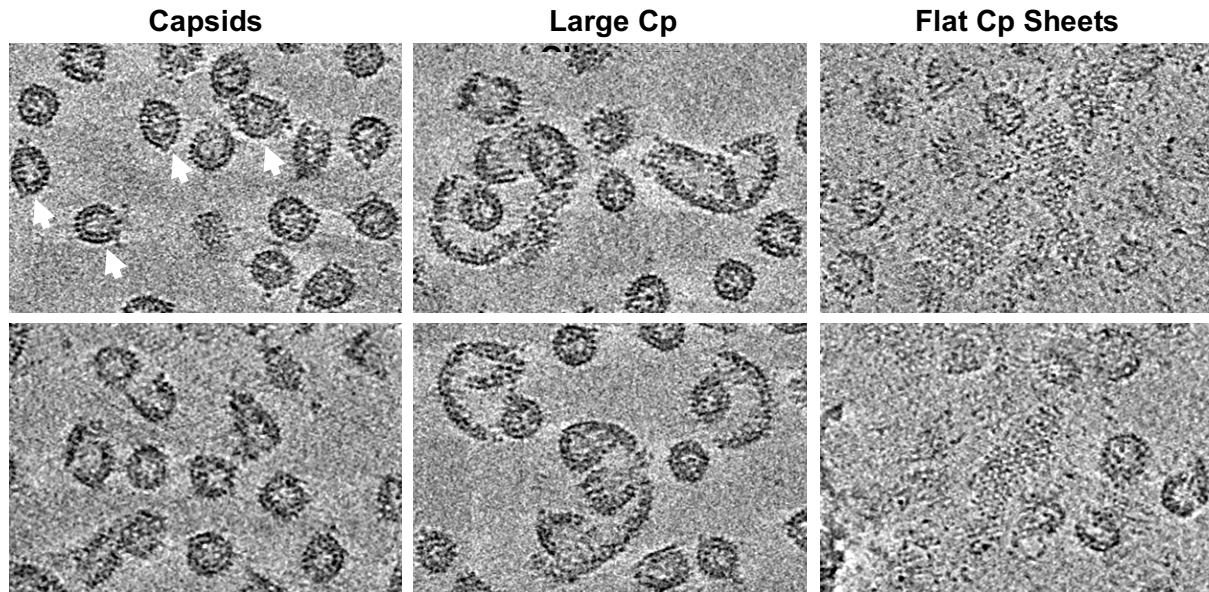

850

851 **Figure 5. Cryo-electron tomographs of Imp $\beta$  and HAP12-bound empty capsids revealed a**  
852 **diverse group of particles and Cp oligomers.** Selected slices from tomograms of capsids treated  
853 with saturating HAP12 (for 2 hours) and Imp $\beta$  (16 hours) suggest a progression of events.  
854 Capsid-sized objects, some of which are clearly distorted and broken (arrows), are the most  
855 common species (left column). Large Cp oligomers have many more dimers than a capsid and  
856 have a much larger radius of curvature (middle column). Flat Cp sheets are seen in some  
857 tomographic sections; these may result from a capsid unfurling or may result from free dimers  
858 self-assembling with planar geometry (right column).

859

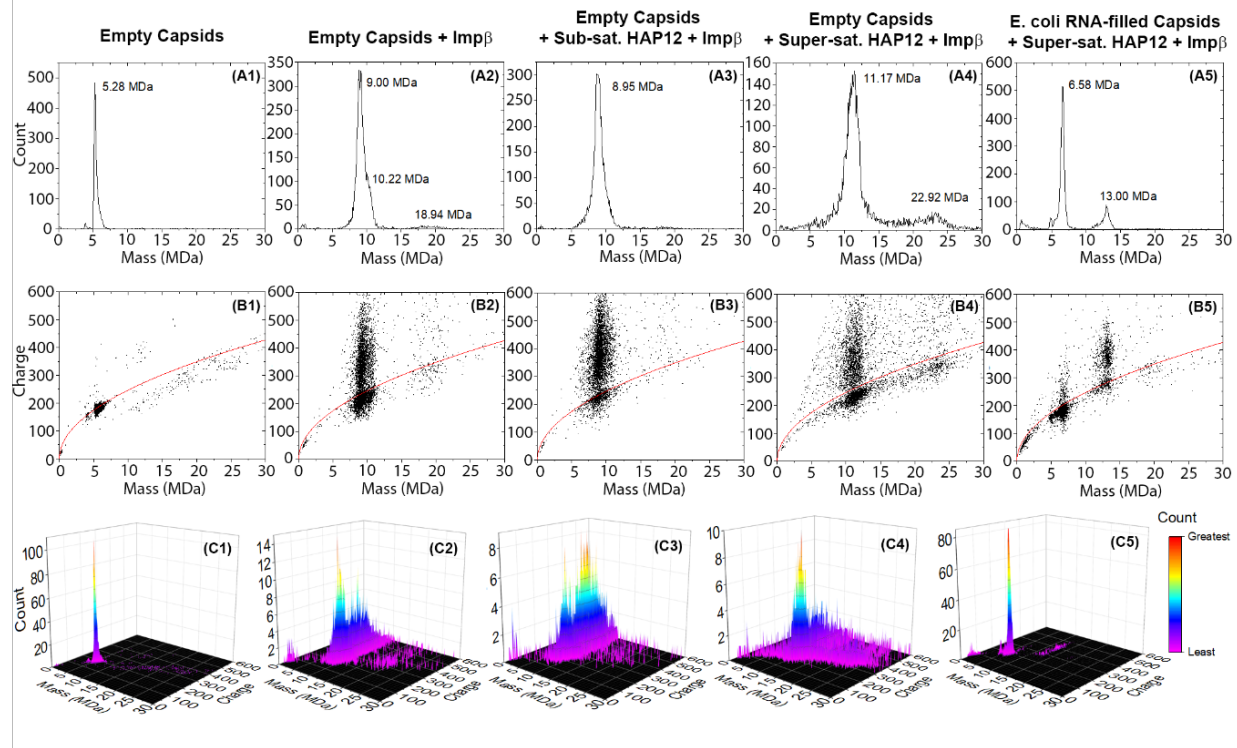

860

861 **Figure 6. CDMS of empty capsids  $\pm$  Imp $\beta$   $\pm$  HAP12 showed shifts in mass and charge.** Panels:  
862 A1-A5 mass spectra, B1-B5 charge vs. mass plots to identify individual ions (the Raleigh limit  
863 (red) shows the theoretical limit for the of charges on a spherical ion), and C1-C5 3D heat maps  
864 to identify distributions of populations. For empty capsids, mass shifts indicated Imp $\beta$  binding  
865 to capsids. Most capsids showed two charged populations: a population near the Rayleigh limit,  
866 suggesting spherical particles, and a second, higher charged plume, suggesting extended or  
867 highly textured structures. Columns 1-4 show how empty capsids change mass and charge  
868 distributions in response to Imp $\beta$  and/or HAP12. E. coli RNA-filled capsids (column 5)  $\pm$  Imp $\beta$   $\pm$   
869 HAP12 exhibited no significant changes in their mass spectra, charge vs. mass plots, or 3D  
870 heatmaps.

871

872

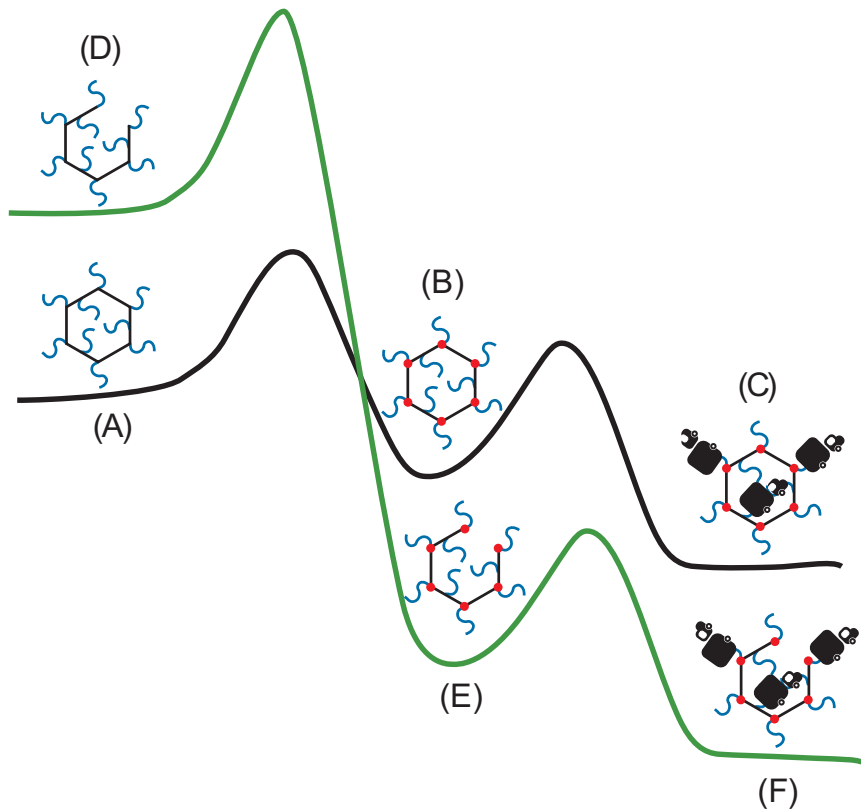

873

874

875

876

877

878

879

880

881

882

883

884

885

886

887

888

889

890

891

892

893

894

895

**Figure 7. Free energy diagram of an empty capsid in its strained (A-C, black) and ruptured (D-F, green) states mediated by HAP12 and Imp $\beta$ .** Free energy schematics for a strained (A-C) or ruptured (D-F) empty capsid shown in black and green, respectively. Because it has fewer interdimer contacts, an untreated, ruptured capsid (D) is at a higher energy state than an intact, drug-free capsid (A). After enough HAP molecules (red dots) bind to cause capsid deformation, the strained, intact capsid (B) pays a global strain penalty and is at a higher energy level. By rupturing, a HAP-bound capsid relieves the global strain and achieves a lower energy state (E). Although Imp $\beta$ -binding (black trucks) provides some stability to capsids, this interaction applies further mechanical strain on the capsid (C), which can be energetically compensated by rupturing (F).

896 **Supplemental Figures**  
897

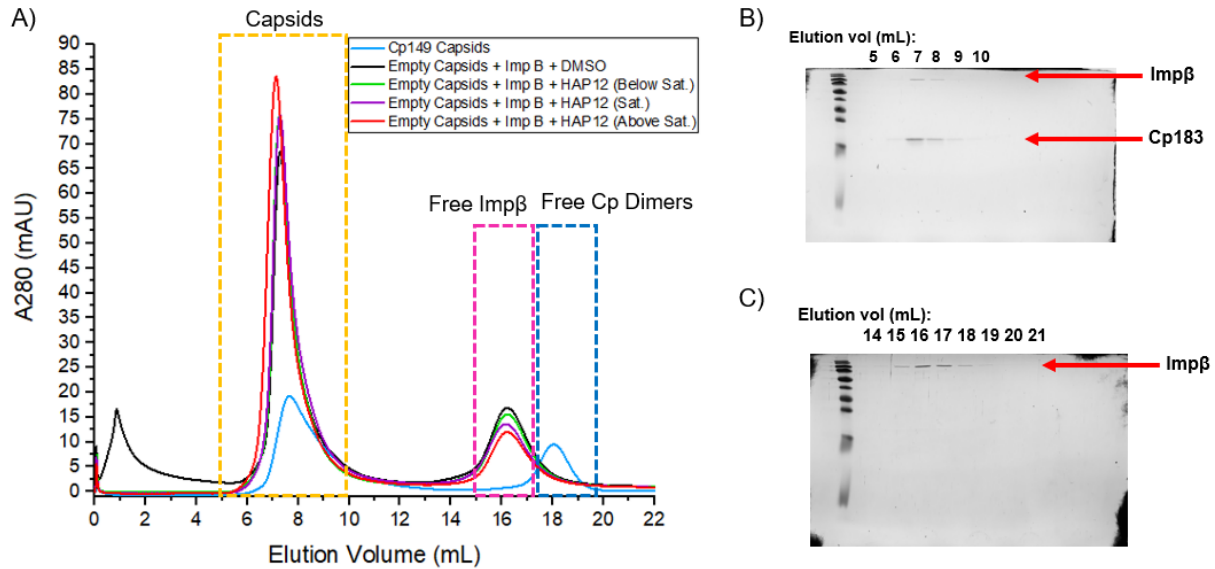

898  
899 **Supplementary Figure 1. At super-sat. [HAP12], the capsid peak shifted to the left, which**  
900 **indicated elution of complexes larger than capsids.** To resolve Impβ-bound capsids, 200 μL of  
901 each sample were injected onto a Superose 6 column. SEC fractions were collected and  
902 analyzed via SDS-PAGE. Panel A shows a compiled chromatograph of empty capsids ± Impβ ±  
903 varying HAP12 concentrations; a mixture of Cp149 capsids and dimers were run as a control.  
904 The dashed boxes designate at which volumes certain proteins elute at: yellow – capsids, pink –  
905 free Impβ, and blue – free dimers. Panels B-C show gel images of collected SEC fractions. Panel  
906 B shows co-elution of Cp183 and Impβ at 7-9 mL. Panel C shows elution of free Impβ at 15-19  
907 mL.

908  
909  
910  
911  
912  
913  
914  
915  
916  
917  
918  
919  
920  
921  
922  
923  
924

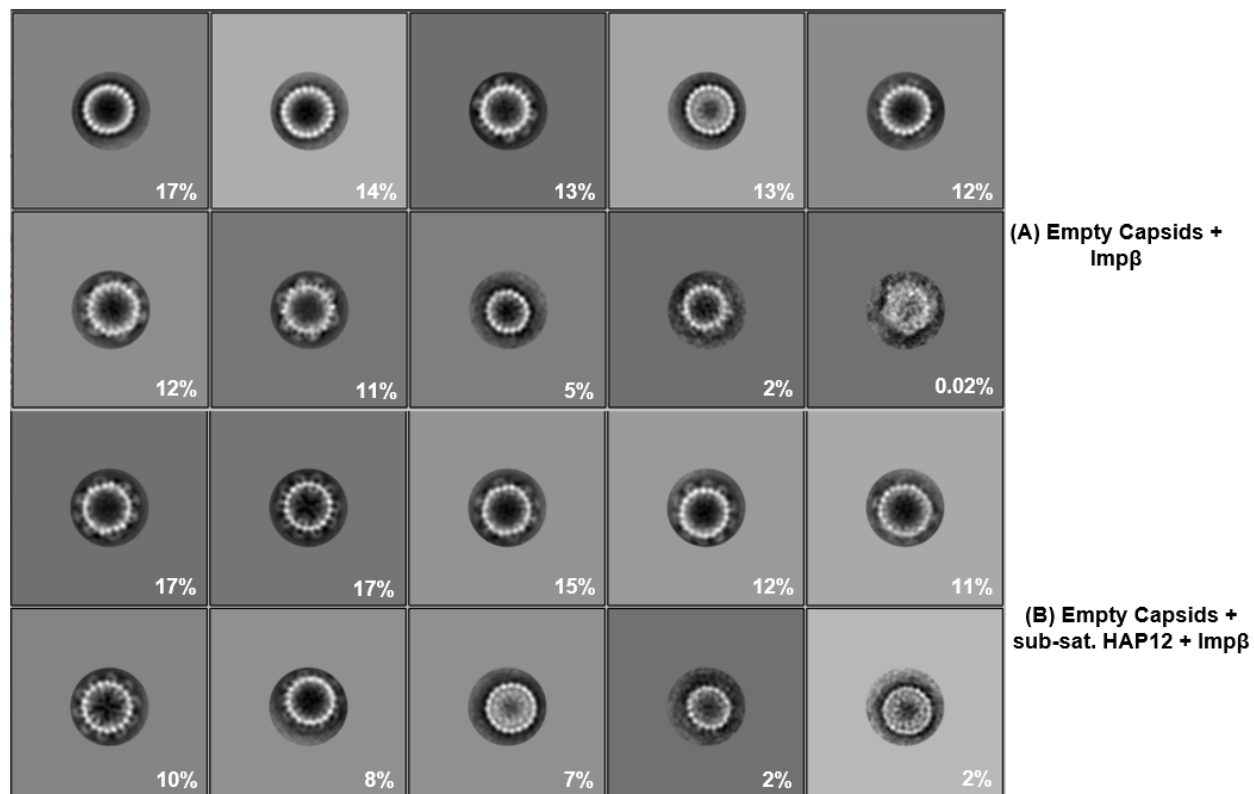

925  
926 **Supplementary Figure 2. Empty capsids treated with sub-saturating HAP12 appeared to have**  
927 **more externally bound Impβ than drug-free capsids.** Class averages of HAP-free empty capsids  
928 + Impβ (4,718 particles) and empty capsids + sub-saturating HAP12 + Impβ (5,118 particles)  
929 were compared for differences on capsid morphology (A and B). Empty capsids were prepared  
930 as previously stated in Figure 4. HAP12-free empty capsids showed four classes (48% of total  
931 particles) with visible, externally bound Impβ (A). However, capsids treated with sub-saturating  
932 HAP12 showed seven classes (90% of total particles) with external Impβ (B). These observations  
933 suggested that sub-stoichiometric HAP12 stabilized Cp-Cp interactions, preventing breakage of  
934 dimer-dimer contacts and internalization of Impβ.

935  
936  
937  
938  
939  
940  
941  
942  
943  
944  
945  
946  
947  
948

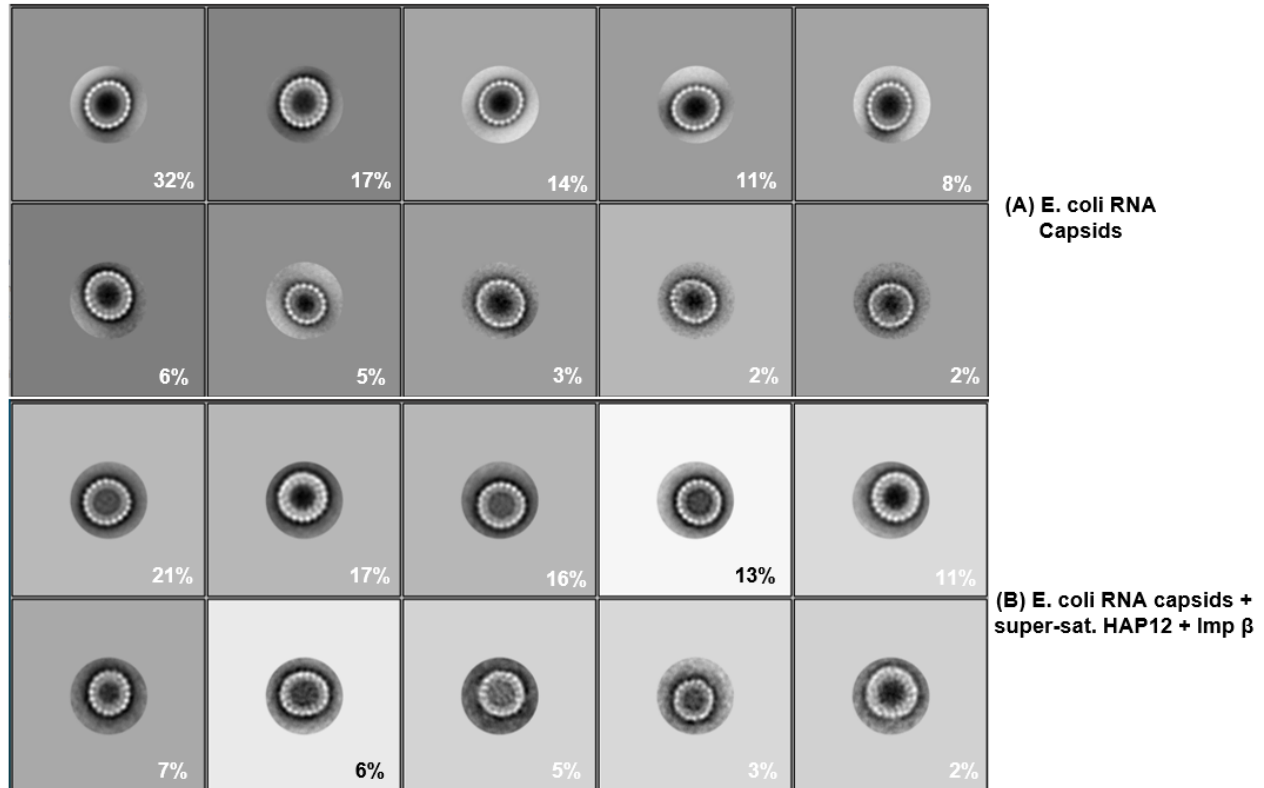

949  
950  
951  
952  
953  
954  
955  
956  
957  
958  
959  
960  
961  
962  
963  
964  
965  
966  
967  
968  
969  
970  
971  
972

**Supplementary Figure 3. After treatment with super-saturating HAP12 and Imp $\beta$ , E. coli RNA-filled capsids appeared intact and spherical.** Class averages of E. coli RNA-filled capsids with no HAP12 (4,319 particles) or with super-saturating HAP12 + Imp $\beta$  (4,247 particles) were compared for differences on capsid morphology (A and B, respectively). E. coli RNA capsids were prepared as previously stated in Figure 4. Untreated E. coli RNA capsids appeared intact and round (A). Similarly, E. coli RNA capsids treated with super-saturating HAP12 and Imp $\beta$  also appeared to be intact and spherical, suggesting that internal RNA prevented capsid deformation and disruption (B).

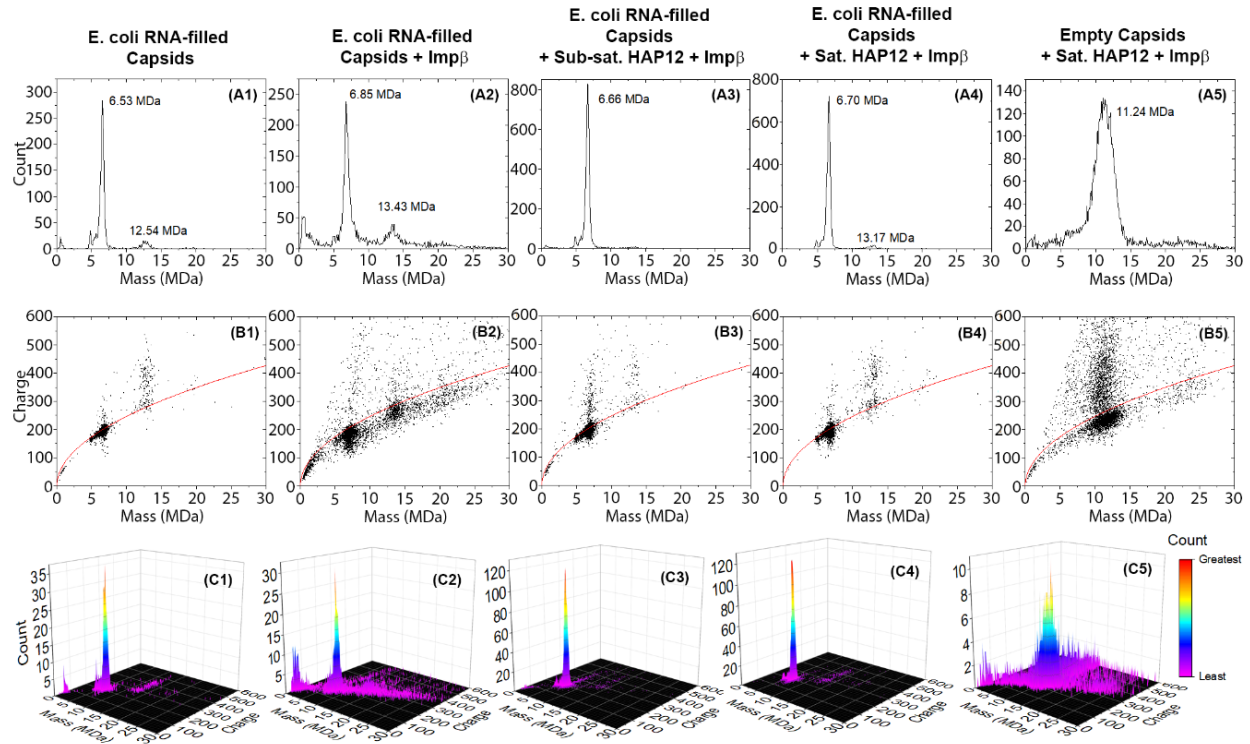

973  
974  
975  
976  
977  
978  
979  
980  
981  
982  
983

**Supplementary Figure 4. CDMS of *E. coli* RNA-filled capsids  $\pm$  Imp $\beta$   $\pm$  HAP12 showed no significant shifts in mass and charge.** Panels: A1-A5 mass spectra, B1-B5 charge vs. mass plots with Rayleigh limit (red curve), and C1-C5 3D heatmaps. For *E. coli* RNA-filled capsids, no mass shifts were observed despite addition of Imp $\beta$  or HAP12. For all *E. coli* RNA capsid samples, a concentration of ions was detected along the Rayleigh limit, suggesting spherical capsids. The 3D heatmaps show that *E. coli* RNA capsids fall into a single population of ions. Conversely, after addition of super-saturating HAP12 and Imp $\beta$ , empty capsids undergo a mass shift and ion population changes that are similar to empty capsids treated with saturating HAP12 (Figure 6).
